## Nucleosome patterns in circulating tumor DNA reveal transcriptional regulation of advanced prostate cancer phenotypes

Navonil De Sarkar<sup>1,2,3,4\*</sup>, Robert D. Patton<sup>1,2,\*</sup>, Anna-Lisa Doebley<sup>1,2,5,6</sup>, Brian Hanratty<sup>2</sup>, Adam J. Kreitzman<sup>1,2</sup>, Jay F. Sarthy<sup>7</sup>, Minjeong Ko<sup>1,2</sup>, Mohamed Adil<sup>1</sup>, Sandipan Brahma<sup>7</sup>, Michael P. Meers<sup>7</sup>, Derek H. Janssens<sup>7</sup>, Lisa A. Ang<sup>2</sup>, Ilsa Coleman<sup>2</sup>, Arnab Bose<sup>2</sup>, Ruth F. Dumpit<sup>2</sup>, Jared M. Lucas<sup>2</sup>, Talina A. Nunez<sup>2</sup>, Holly M. Nguyen<sup>8</sup>, Heather M. McClure<sup>9</sup>, Colin C. Pritchard<sup>10,11</sup>, Michael T. Schweizer<sup>3,12</sup>, Colm Morrissey<sup>8</sup>, Atish D. Choudhury<sup>9,13</sup>, Sylvan C. Baca<sup>9,13</sup>, Jacob E. Berchuck<sup>9</sup>, Matthew L. Freedman<sup>9,13</sup>, Kami Ahmad<sup>6</sup>, Michael C. Haffner<sup>2,3,10</sup>, Bruce Montgomery<sup>12</sup>, Eva Corey<sup>8</sup>, Steven Henikoff<sup>7,14</sup>, Peter S. Nelson<sup>2,3,8,11,12,†</sup>, Gavin Ha<sup>1,2,11,15,†</sup>

<sup>1</sup> Division of Public Health Sciences, Fred Hutchinson Cancer Center, 1100 Fairview Ave. N, Seattle, WA 98109

<sup>2</sup> Division of Human Biology, Fred Hutchinson Cancer Center, 1100 Fairview Ave. N, Seattle, WA 98109

<sup>3</sup> Division of Clinical Research, Fred Hutchinson Cancer Center, 1100 Fairview Ave. N, Seattle, WA 98109

<sup>4</sup> Department of Pathology and Prostate Cancer Center of Excellence, Medical College of Wisconsin, 8701 W Watertown Plank Road, Milwaukee, WI 53226

<sup>5</sup> Molecular and Cellular Biology Graduate Program, University of Washington, 1959 NE Pacific St, Seattle WA 98195

<sup>6</sup> Medical Scientist Training Program, University of Washington, 1959 NE Pacific St, Seattle WA 98195

<sup>7</sup> Division of Basic Sciences, Fred Hutchinson Cancer Center, 1100 Fairview Ave. N, Seattle, WA 98109

<sup>8</sup> Department of Urology, University of Washington, 1959 NE Pacific St, Seattle, WA, 98195

<sup>9</sup> Dana-Farber Cancer Institute, 450 Brookline Ave, Boston, MA 02215

<sup>10</sup> Department of Laboratory Medicine and Pathology, University of Washington, 1959 NE Pacific St, Seattle, WA 98195

<sup>11</sup> Brotman Baty Institute for Precision Medicine, 1959 NE Pacific Ste, Seattle, WA, 98195

<sup>12</sup> Division of Oncology, Department of Medicine, University of Washington

<sup>13</sup> Broad Institute of MIT and Harvard, 415 Main Street, Cambridge, MA 02142

<sup>14</sup> Howard Hughes Medical Institute, USA

<sup>15</sup> Department of Genome Sciences, University of Washington, 1959 Pacific St, Seattle, WA, 98195

\* These authors contributed equally.

† Co-senior authors.

**RUNNING TITLE:** Cancer phenotype classification using ctDNA

**KEYWORDS:** Circulating tumor DNA, liquid biopsies, castration-resistant prostate cancer, patient-derived xenografts, fragmentomics

### ADDITIONAL INFORMATION

#### ***Financial support:***

This research was supported by the Pacific Northwest Prostate Cancer SPORE grant (P50 CA097186) and Department of Defense Idea Development Award (W81XWH-21-1-0513). This work was also supported by the Brotman Baty Institute for Precision Medicine grants (to G.H., R.D.P., and N.D.S.), Prostate Cancer Foundation Young Investigator Awards (G.H. and N.D.S.), National Institutes of Health (K22 CA237746 and R21 CA264383 to G.H.; R01 CA234715 to P.S.N.; P01 CA163227 to P.S.N. E.C., and C.M.; R01 CA251555 to M.L.F.; K99 GM138920 to S.B.; K99 GM140251 to M.P.M.), Department of Defense (W81XWH-18-1-0406 to P.S.N.; W81XWH-17-1-0380 to N.D.S.; W81XWH-18-0756, W81XWH-18-1-0356, PC170510, PC170503P2, PC200262P to C.C.P.; W81XWH-20-1-0118 to J.E.B.; W81XWH-20-1-0084 to A.B.). Support was also provided by the Prostate Cancer Foundation, the Institute for Prostate Cancer Research, V Foundation Scholar Grants (to G.H. and M.C.H.), Fund for Innovation in Cancer Informatics

Major Grant (to G.H.); Doris Duke Charitable Foundation and Safeway Foundation (to M.C.H.); Wong Family Award in Translational Oncology and Dana-Farber Cancer Institute Medical Oncology grant (to A.D.C.); H.L. Snyder Medical Research Foundation, the Cutler Family Fund for Prevention and Early Detection, and Claudia Adams Barr Program for Innovative Cancer Research (to M.L.F.); ASCO Young Investigator Award, Kure It Cancer Research Foundation, and PhRMA Foundation (to S.C.B.). This research was also supported in part by the NIH/NCI Cancer Center Support Grant (P30 CA015704) and Scientific Computing Infrastructure (ORIP Grant S10OD028685).

**Correspondence:**

Gavin Ha, Ph.D.  
Fred Hutchinson Cancer Center  
1100 Fairview Ave. N,  
Seattle, WA 98109  
206-667-2802  
[gha@fredhutch.org](mailto:gha@fredhutch.org)

Peter S. Nelson, M.D.  
Fred Hutchinson Cancer Center  
1100 Fairview Ave. N,  
Seattle, WA 98109  
206-667-3377  
[pnelson@fredhutch.org](mailto:pnelson@fredhutch.org)

**Conflict of interest disclosure:**

The authors have filed a pending patent application on methodologies developed in this manuscript (G.H., A-L.D., N.D.S., R.D.P., P.S.N.).

P.S.N.: Served as a paid consultant to Janssen, Astellas, Pfizer, and Bristol Myers Squibb in work unrelated to the present study.

B.M.: Has institutional funding from Clovis, Janssen, Astellas, BeiGene, and AstraZeneca.

E.C.: Received research funding under institutional SRA from Janssen Research and Development, Bayer Pharmaceuticals, KronosBio, Forma Pharmaceuticals Foghorn, Gilead, Sanofi, AbbVie, and GSK for work unrelated to the present study.

M.L.F.: Serves as a consultant to and has equity in Nuscan Diagnostics. This activity is outside of the scope of this manuscript. M.L.F. has a pending patent for detecting NEPC using DNA methylation.

M.T.S.: Paid consultant and/or received Honoraria from Sanofi, AstraZeneca, PharmaIn and Resverlogix. He has received research funding to his institution from Zenith Epigenetics, Bristol Myers Squibb, Merck, Immunomedics, Janssen, AstraZeneca, Pfizer, Madison Vaccines, Hoffman-La Roche, Tmunity, SignalOne Bio and Ambrx, Inc.

All other authors declare no competing interests.

1 **ABSTRACT**

2 Advanced prostate cancers comprise distinct phenotypes, but tumor classification remains  
3 clinically challenging. Here, we harnessed circulating tumor DNA (ctDNA) to study tumor  
4 phenotypes by ascertaining nucleosome positioning patterns associated with transcription  
5 regulation. We sequenced plasma ctDNA whole genomes from patient-derived xenografts  
6 representing a spectrum of androgen receptor active (ARPC) and neuroendocrine (NEPC)  
7 prostate cancers. Nucleosome patterns associated with transcriptional activity were reflected in  
8 ctDNA at regions of genes, promoters, histone modifications, transcription factor binding, and  
9 accessible chromatin. We identified the activity of key phenotype-defining transcriptional  
10 regulators from ctDNA, including AR, ASCL1, HOXB13, HNF4G, and NR3C1. Using these  
11 features, we designed a prediction model which distinguished NEPC from ARPC in patient plasma  
12 samples across three clinical cohorts with 97-100% sensitivity and 85-100% specificity. While  
13 phenotype classification is typically assessed by immunohistochemistry or transcriptome profiling,  
14 we demonstrate that ctDNA provides comparable results with numerous diagnostic advantages  
15 for precision oncology.

16

17 **STATEMENT OF SIGNIFICANCE**

18 This study provides key insights into the dynamics of nucleosome positioning and gene regulation  
19 associated with cancer phenotypes that can be ascertained from ctDNA. The new methods  
20 established for phenotype classification extend the utility of ctDNA beyond assessments of DNA  
21 alterations with important implications for molecular diagnostics and precision oncology.

## 22 INTRODUCTION

23 Metastatic castration-resistant prostate cancer (mCRPC) describes the stage in which the disease  
24 has developed resistance to androgen ablation therapies and is lethal (1). Androgen receptor  
25 signaling inhibitors (ARSI), designed for the treatment of CRPC, repress androgen receptor (AR)  
26 activity and improve survival, but these therapies eventually fail (2,3). Since the adoption of ARSI  
27 as standard-of-care for mCRPC, there has been a prominent increase in the frequency of  
28 treatment-resistant tumors with neuroendocrine (NE) differentiation and features of small cell  
29 carcinomas (4–7). These aggressive tumors may develop through a resistance mechanism of  
30 trans-differentiation from AR-positive adenocarcinoma (ARPC) to NE prostate cancer (NEPC) that  
31 lack AR activity (4,7–10). Additional phenotypes can also arise based on expression of AR activity  
32 and NE genes, including AR-low prostate cancer (ARLPC) and double-negative prostate cancer  
33 (DNPC; AR-null/NE-null) (5,11–13). Distinguishing prostate cancer subtypes has clinical  
34 relevance in view of differential responses to therapeutics, but the need for a biopsy to diagnose  
35 tumor histology can be challenging: invasive procedures are expensive and accompanied by  
36 morbidity, a subset of tumors are not accessible to biopsy, and bone sites pose particular  
37 challenges with respect to sample quality (7,14).

38 Circulating tumor DNA (ctDNA) released from tumor cells into the blood as cell-free DNA (cfDNA)  
39 is a non-invasive “liquid biopsy” solution for accessing tumor molecular information. The analysis  
40 of ctDNA to detect mutation and copy-number alterations has served to classify genomic subtypes  
41 of CRPC tumors (4,15–21). However, the defining losses of *TP53* and *RB1* in NEPC do not always  
42 lead to NE trans-differentiation (7,22). Rather, ARPC and NEPC tumors are associated with  
43 distinct reprogramming of transcriptional regulation (8,9,23). Methylation analysis of cfDNA in  
44 mCRPC to profile the epigenome shows promise for distinguishing phenotypes, but requires  
45 specialized assays such as bisulfite treatment, enzymatic treatment, or immunoprecipitation (24–  
46 27).

47 The majority of cfDNA represents DNA protected by nucleosomes when released from dying cells  
48 into circulation, leading to DNA fragmentation that is reflective of the non-random enzymatic  
49 cleavage by nucleases (28,29). Emerging approaches to analyze cfDNA fragmentation patterns  
50 from plasma for studying cancer can be performed directly from standard whole genome  
51 sequencing (WGS) (30–34). cfDNA fragments have the characteristic size of 167 bp, consistent  
52 with protection by a single core nucleosome octamer and histone linkers, but the size distribution  
53 may vary between healthy individuals and cancer patients (35–38). Recent studies have

54 demonstrated that the nucleosome occupancy in cfDNA at the transcription start site (TSS) and  
55 transcription factor binding site (TFBS) can be used to infer gene expression and transcription  
56 factor (TF) activity from cfDNA (39–41). However, nucleosome positioning and spacing are  
57 dynamic in active and repressed gene regulation (42–44). A detailed understanding of the  
58 nucleosome organization and positioning patterns associated with transcriptional regulation has  
59 not been fully explored in cfDNA.

60 A major challenge for ctDNA analysis is the low tumor content (tumor fraction) in patient plasma  
61 samples. By contrast, plasma from patient-derived xenograft (PDX) models may contain nearly  
62 pure human ctDNA after bioinformatic exclusion of mouse DNA reads (36,38). This provides a  
63 resource that is ideal for studying the properties of ctDNA, developing new analytical tools, and  
64 validating both genetic and phenotypic features by comparison to matching tumors. In this study,  
65 we performed WGS of ctDNA from mouse plasma across 24 CRPC PDX lines with diverse  
66 phenotypes. Applying newly developed computational methods, we comprehensively  
67 interrogated the nucleosome patterns in ctDNA across genes, regulatory loci, TFBSs, TSSs, and  
68 open chromatin sites to reveal transcriptional regulation associated with mCRPC phenotypes.  
69 Finally, we designed a probabilistic model to accurately classify treatment-resistant tumors into  
70 divergent phenotypes and validated its performance in 159 plasma samples from three mCRPC  
71 patient cohorts. Overall, these results highlight that transcriptional regulation of tumor phenotypes  
72 can be ascertained from ctDNA and has potential utility for diagnostic applications in cancer  
73 precision medicine.

## 74 **RESULTS**

### 75 **Comprehensive resource of matched tumor and liquid biopsies from patient derived** 76 **xenograft (PDX) models of advanced prostate cancer**

77 We used 26 models from the LuCaP PDX series of advanced prostate cancer with well-defined  
78 mCRPC phenotypes (45). The models consisted of 18 classified as ARPC, two classified as AR-  
79 low and NE-negative prostate cancer (ARLPC), and six classified as NEPC (**Figure 1A,**  
80 **Supplementary Table S1**). For each PDX line, we pooled mouse plasma from seven to ten mice,  
81 extracted cfDNA, and performed deep whole genome sequencing (WGS; mean 38.4x coverage,  
82 range 21 – 85x) (**Methods, Figure 1A**). We observed that 25 lines had human ctDNA comprising  
83 more than 10% of the sample (mean 52.9%, range 10.6 – 96%) with NEPC samples having  
84 significantly higher human fractions (mean 85.1%, range 77.1 – 96%, two-tailed Mann-Whitney U  
85 test  $p = 9.6 \times 10^{-4}$ ) (**Figure 1B, Supplementary Table S1**). We used bioinformatic subtraction of

86 mouse sequenced reads to obtain nearly pure human ctDNA data (**Methods**). After subsequent  
87 filtering by human ctDNA sequencing coverage, 24 PDX lines remained for further analysis (16  
88 ARPC, 6 NEPC, 2 ARLPC; mean 20.5x, range 3.8 – 50.6x, **Supplementary Table S1**). In the  
89 matching tumors, we performed Cleavage Under Targets and Release using Nuclease  
90 (CUT&RUN) to profile H3K27ac, H3K4me1, and H3K27me3 histone post-translational  
91 modifications (PTMs) (46,47) (**Supplementary Fig. S1**). We hypothesized that nucleosome  
92 organization inferred from ctDNA reflects the transcriptional activity state regulated by histone  
93 PTMs (48).

94 To study transcriptional regulation in mCRPC phenotypes from ctDNA, we interrogated four  
95 different features: local promoter coverage, nucleosome positioning, fragment size analysis, and  
96 composite TFBSs and open chromatin sites analysis using the Griffin framework (49) (**Figure 1A**,  
97 **Methods**). First, we analyzed three different local regions within ctDNA: all gene promoters and  
98 gene bodies and sites of histone PTMs guided by CUT&RUN analysis. For each of the three local  
99 regions, we extracted features of nucleosome periodicity using a nucleosome phasing approach  
100 and computed the fragment size variability; for promoter regions, we also computed the coverage  
101 at the transcription start site (TSS). Next, we analyzed ctDNA at transcription factor binding sites  
102 (TFBSs) and open chromatin regions. For each transcription factor (TF), ctDNA coverage at  
103 TFBSs were aggregated into composite profiles representing the inferred activity (41,49).  
104 Similarly, features in the composite profiles of subtype-specific open chromatin regions were  
105 extracted for analyzing the signatures of chromatin accessibility in ctDNA. Altogether, we  
106 assembled a multi-omic sequencing dataset from matching tumor and plasma for a total of 24  
107 PDX lines, making this a unique molecular resource and platform for developing transcriptional  
108 regulation signatures of tumor phenotype prediction from ctDNA.

### 109 **Characterizing transcriptional activity of AR and ASCL1 in PDX phenotypes through** 110 **analysis of tumor histone modifications and ctDNA**

111 Prostate cancer phenotypes in mCRPC patients have distinct transcriptional signatures and these  
112 are also observed in the LuCaP PDX lines (11). We sought to further characterize the  
113 transcriptional activity in different tumor phenotypes by studying epigenetic regulation via histone  
114 PTMs. We identified broad peak regions for H3K4me1 (median of 17,643 regions, range 1,894 –  
115 64,934), H3K27ac (median 7,093, range 1610 - 34,047), and H3K27me3 (median 8,737, range  
116 2,024 - 42,495) in the tumors of the 24 PDX lines and an additional nine LuCaP PDX lines where  
117 only tumor was available (total of 25 ARPC, 2 ARLPC, and 6 NEPC) (**Methods, Supplementary**

118 **Fig. S1, Supplementary Table S2**). Using unsupervised clustering and principal components  
119 analysis (PCA), we identified putative active regulatory regions of enhancers and promoters  
120 (H3K27ac, H3K4me1) and gene repressive heterochromatic mark (H3K27me3) that were specific  
121 to ARPC, ARLPC, and NEPC phenotypes (50) (**Supplementary Fig. S2A**).

122 AR and ASCL1 are two key differentially expressed TFs with known regulatory roles in ARPC and  
123 NEPC phenotypes, respectively (9,51–53). When inspecting AR binding sites in ARPC tumors,  
124 we observed increased signals from flanking nucleosomes with H3K27ac PTMs compared to the  
125 other phenotypes (area under mean peak profile of 18.46 vs. 15.08 in ARLPC and 10.63 in NEPC)  
126 **Figure 2A, Supplementary Fig. S2B, Methods**). We also observed the strongest signals at the  
127 nucleosome depletion region (NDR) in ARPC for H3K27ac (1.54 coverage decrease vs. 0.78 for  
128 ARLPC and 0.41 for NEPC). Conversely, in NEPC tumors, we observed stronger signals at  
129 nucleosomes with H3K27ac PTMs flanking ASCL1 binding sites (area under mean peak profile  
130 62.65 vs. 29.18 for ARLPC and 10.83 for ARPC), and stronger NDR signals (2.26 coverage  
131 decrease vs. 0.19 for ARPC and 0.37 for ARLPC). We observed similar trends for H3K4me1  
132 PTMs in the LuCaP PDX lines (**Supplementary Fig. S2C**).

133 We analyzed the ctDNA composite coverage profiles at TFBSs to evaluate the nucleosome  
134 accessibility, whereby lower normalized central ( $\pm 30$  bp window) mean coverage across these  
135 sites suggests more nucleosome depletion (**Methods**). For AR TFBSs, we observed the strongest  
136 signal for nucleosome depletion in ARPC, as indicated by the lowest mean central coverage  
137 (average 0.64,  $n=16$ ), compared to moderate signals for ARLPC (average 0.88,  $n=2$ ), and  
138 weakest signals for NEPC (average 0.95,  $n=6$ ) (**Figure 2B**). Conversely, the composite coverage  
139 profile at ASCL1 TFBSs showed the strongest nucleosome depletion for NEPC samples (mean  
140 central coverage 0.69) compared to ARLPC (0.86) and ARPC (0.88) (**Figure 2C**). These  
141 observations were consistent with the differential binding activity by AR and ASCL1 in their  
142 respective phenotypes from tumor tissue (**Figure 2A**). Furthermore, the ctDNA coverage patterns  
143 of the nucleosome depletion in ctDNA resembled the NDR flanked by nucleosomes with H3K27ac  
144 and H3K4me1 peak profiles, which was exemplified when analyzing only nucleosome-sized  
145 fragments (140 bp – 200 bp) generated by CUT&RUN (**Figure 2A, Supplementary Fig. S2B-C**).  
146 Together, these results suggest that the nucleosome depletion in ctDNA at AR and ASCL1  
147 binding sites represents active TF binding and regulatory activity in specific prostate PDX tumor  
148 phenotypes.

149 **Nucleosome patterns at gene promoters inferred from ctDNA are consistent with**  
150 **transcriptional activity for phenotype-specific genes**

151 We selected 47 genes comprising 12 ARPC and 35 NEPC lineage markers established previously  
152 (4,54) and confirmed by differential expression analysis from PDX tumor RNA-Seq data (**Figure**  
153 **2D, Supplementary Table S3, Methods**). To assess the activity of these genes from ctDNA, we  
154 analyzed the ctDNA fragment size in TSSs ( $\pm 1$  kb window) and gene bodies, and we found that  
155 the differential size variability between phenotypes was positively correlated with relative  
156 expression (Spearman's  $r = 0.844$ ,  $p = 9.4 \times 10^{-14}$ , **Figure 2E, Supplementary Fig. S3A,**  
157 **Supplementary Table S2, Methods**). Next, we analyzed the relative ctDNA coverage at the TSS  
158 ( $\pm 1$  kb) but did not observe an association between the phenotypes (**Supplementary Fig. S3B**).  
159 However, closer inspection of the ctDNA coverage patterns at the promoters revealed consistent  
160 nucleosome organization for transcription activity and repression (39,55–57) (**Figure 2D**).  
161 Therefore, we grouped the genes based on differential signals in H3K27me3 histone PTMs, which  
162 are associated with repressed transcription or nucleosome compaction (58). For 25 genes (Group  
163 1) without differential H3K27me3 peaks, including AR, FOXA1, KLK3 and ASCL1, we observed  
164 nucleosome depletion at the TSS consistent with presence of active PTMs, such as for AR (mean  
165 coverage 0.47,  $n=16$ ) in ARPC and ASCL1 (0.30,  $n=6$ ) in NEPC samples (**Figure 2F,**  
166 **Supplementary Fig. S4**). By contrast, we observed increased coverage at the TSS of AR (1.08)  
167 in NEPC and ASCL1 (0.42) in ARPC, which supports the nucleosome depletion in the absence  
168 of PTMs and inactive transcription. For 22 genes (Group 2) with differential H3K27me3 peaks,  
169 including STEAP1, CHGB and SRRM4, we observed a relatively more consistent increase in  
170 nucleosome occupancy and phasing in the TSS as well as in the gene body for NE-specific genes  
171 (**Figure 2G, Supplementary Fig. S5**). The neural signaling genes in this group, such as UNC13A  
172 and INSM1, had reduced signals for nucleosome positioning, consistent with the heterogeneous  
173 ('fuzzy') nucleosome patterns described for actively transcribed genes (43,59). Interestingly, while  
174 UNC13A was repressed in ARPC tumors, it did not have H3K27ac nor H3K4me1 accessible PTM  
175 marks in NEPC tumors despite being expressed (**Supplementary Fig. S3B-C**). These results  
176 illustrate that ctDNA analysis can reveal patterns that are consistent with transcriptional regulation  
177 by histone modifications for key genes that define prostate cancer phenotypes.

178 **Phasing analysis in ctDNA reveals nucleosome periodicity associated with transcriptional**  
179 **activity between CRPC phenotypes**

180 To systematically quantify inter-nucleosomal spacing and predict nucleosome phasing, we  
181 developed TritonNP, a tool utilizing Fourier transforms and band-pass filters on the normalized



182 ctDNA coverage to isolate frequency components with periodicities larger than 146 bp (**Figure**  
183 **3A, Supplementary Fig. S6, Methods**). This approach allows for calling phased nucleosome  
184 dyad positions to generate an average inter-nucleosome distance from the originating cells,  
185 encapsulating potential heterogeneity in nucleosome occupancy and stability. Regions of inactive  
186 or repressed transcription are expected to have stably bound nucleosomes, resulting in more  
187 periodic (ordered) phasing in the gene body (56,60,61). Conversely, actively transcribed regions  
188 may exhibit overall disordered phasing due to transient nucleosome occupancy, resulting in  
189 relatively aperiodic patterns with variable degrees of nucleosome depletion. In PDX ctDNA, we  
190 observed a larger mean phased-nucleosome distance across 17,946 genes in the ARPC lines  
191 compared to the NEPC lines (median 291.1 bp vs. 282.6 bp,  $p = 0.027$ ; two-tailed Mann-Whitney  
192 U test, **Figure 3B**). The phased nucleosome distance was also negatively correlated with the  
193 mean cell cycle progression (CCP) score (Spearman's  $\rho = -0.563$ ,  $p = 0.006$ , **Figure 3C,**  
194 **Methods**). These results suggest increased nucleosome periodicity in NEPC ctDNA may  
195 reflecting the condensed chromatin in hyperchromatic nuclei of NE cells (14), and the phasing  
196 analysis may have potential utility for assessing tumor proliferation and aggressiveness (62).

197 To model the relationship between nucleosome phasing and transcriptional activity more directly,  
198 we further extracted the frequency components corresponding to the inter-nucleosomal distances  
199 of the core dyad with spacer (180 – 210 bp) and without (150 – 180 bp). Then, we computed the  
200 ratio of the mean frequency amplitudes between these components, called the nucleosome  
201 phasing score (NPS), where a higher score corresponded to more ordered nucleosome phasing  
202 and repressed transcription. As an example, HOXB13, which is transcriptionally inactive in NEPC  
203 had higher overall GC-corrected coverage (mean 56.85 depth) and a phased nucleosome  
204 distance of 249 bp with a 1.93 NPS in the LuCaP 93 NEPC PDX (**Figure 3A**). By contrast,  
205 HOXB13 is actively transcribed in ARPC and had lower coverage (mean 13.54 depth) and a more  
206 disordered phased-nucleosome distance of 332 bp with a 1.63 NPS in the LuCaP 136 ARPC PDX.  
207 When assessing the 47-prostate cancer phenotype marker genes, we observed that the mean  
208 NPS for the 35 NE genes was lower in NEPC lines compared to ARPC (median NPS 1.95 vs.  
209 2.21,  $p = 0.134$ ; two-tailed Mann-Whitney U test, **Figure 3D**); although this was not statistically  
210 significant, it was consistent with their active transcription. Conversely, the mean NPS for the 12  
211 AR-regulated genes was lower in ARPC lines compared to NEPC (median NPS 1.82 vs 2.13,  $p$   
212  $= 0.070$ ; two-tailed Mann-Whitney U test). In particular, 26 (74%) of the NE genes had lower NPS  
213 in NEPC compared to ARPC ( $\log_2$  fold-change [ARPC:NEPC]  $> 0$ ), including seven genes  
214 (ASCL1, CHGB, CHRNA2, GRP, MYCL, XKR7, NEUROD1) that were statistically significant ( $p$

215 < 0.05); ten (83%) of the AR-regulated genes had lower NPS in ARPC ( $\log_2$  fold-change < 0), with  
216 TMPRSS2 being statistically significant (**Figure 3E, Supplementary Table S3**). These results  
217 illustrate that the NPS captured signals distinguishing key lineage-specific gene markers.

### 218 **Inferred TF activity from analysis of nucleosome accessibility at TFBSs in ctDNA confirms** 219 **key regulators of tumor phenotypes**

220 To characterize the lineage-defining TFs in prostate tumor phenotypes, we considered  
221 nucleosome accessibility at TFBSs in PDX ctDNA. We identified 107 TFs based on the  
222 intersection of 338 TFs analyzed using Griffin and 404 differentially expressed TFs between  
223 ARPC and NEPC PDX tumors (**Supplementary Fig. S7, Supplementary Table S3, Methods**).  
224 Of these TFs, 38 had significantly different accessibility in ctDNA between ARPC and NEPC  
225 phenotypes (two tailed Mann-Whitney U test, Benjamini-Hochberg adjusted  $p < 0.05$ ,  
226 **Supplementary Table S3**). Through unsupervised hierarchical clustering of composite TFBS  
227 central coverage values for the 107 TFs, we observed distinct groups of TFs in PDX ctDNA  
228 (**Figure 3F**). REST had the largest difference in accessibility as supported by a decrease in  
229 coverage within ARPC models compared to NEPC ( $\log_2$  fold-change -0.77, adjusted  $p = 5.7 \times 10^{-4}$ ,  
230 **Supplementary Fig. S8A, Supplementary Table S3**). FOXA1, and GRHL2 were significantly  
231 more accessible in ARPC (and ARLPC) samples compared to NEPC ( $\log_2$  fold-change < -0.57,  
232 adjusted  $p < 1.3 \times 10^{-3}$ ). AR, HOXB13, and NKX3-1 had higher accessibility in ARPC compared  
233 to NEPC ( $\log_2$  fold-change < -0.37, adjusted  $p < 1.3 \times 10^{-3}$ ), but with only moderate accessibility  
234 in ARLPC, as expected. Interestingly, progesterone receptor (PGR) also had high accessibility in  
235 ARPC ( $\log_2$  fold-change -0.33, adjusted  $p = 2.6 \times 10^{-3}$ , **Supplementary Fig. S8A**). We also  
236 observed a group of ARPC-regulated genes that followed a similar trend, including the  
237 glucocorticoid receptor (NR3C1) and other nuclear hormone receptors (NR2F2, RARG), pioneer  
238 factors GATA2 and GATA3, and nuclear factors HNF4G and HNF1A ( $\log_2$  fold-change < -0.10,  
239 adjusted  $p < 0.027$ , **Supplementary Fig. S8A**).

240 For factors that had higher accessibility in NEPC models compared to ARPC and ARLPC, ASCL1  
241 had the largest TFBS coverage difference ( $\log_2$  fold-change 0.36, adjusted  $p = 5.7 \times 10^{-4}$ , **Figure**  
242 **2C, Figure 3F**). Other TFs, including RUNX1, BCL11B, POU3F2, NEUROG2, and SOX2 also  
243 had higher activity in NEPC ( $\log_2$  fold-change > 0.06, adjusted  $p < 0.048$ , **Supplementary Fig.**  
244 **S8B**), although the difference was modest. HEY1, IRF1, and IKZF1 had a similar trend consistent  
245 with increased accessibility in NEPC samples but were not significantly different from ARPC  
246 (adjusted  $p > 0.10$ ). While NKX2-1 and CEBPA had increased accessibility in NEPC compared

247 to ARPC (although not significant with adjusted  $p = 0.47$  and  $0.36$  respectively), these factors  
248 were also modestly active in ARLPC (**Supplementary Fig. S8B, Supplementary Table S3**).  
249 Other notable factors such as MYC and ETS transcription family genes (ETV4, ETV5, ETS1,  
250 ETV1) had high accessibility across all phenotypes, while NEUROD1, RUNX3, and TP63 were  
251 inaccessible in nearly all samples. Overall, we identified the accessibility of known prostate cancer  
252 regulators, including ASCL1, NR3C1, HNF4G, HNF1A, and SOX2 (63–65), that have not been  
253 shown before from ctDNA analysis in these tumor phenotypes.

### 254 **Phenotype-specific open chromatin regions in PDX tumor tissue are reflected in ctDNA** 255 **profiles of nucleosome accessibility**

256 Nucleosome profiling from cfDNA sequencing analysis has shown agreement with overall  
257 chromatin accessibility in tumor tissue (37,41,66); however, its application for distinguishing tumor  
258 phenotypes has been limited. We investigated the use of ATAC-Seq data from tumor tissue for  
259 10 LuCaP PDX lines (5 ARPC and 5 NEPC) to inform phenotype differences in chromatin  
260 accessibility (9). We defined an initial set of 28,765 ARPC and 21,963 NEPC differential  
261 consensus open chromatin regions which we further restricted to those that overlapped TFBSs  
262 for 338 TFs, resulting in 15,881 ARPC and 11,694 NEPC sites (**Methods, Figure 4A**). For ARPC-  
263 specific open chromatin sites, we observed decreased overall composite site coverage ( $\pm 1$  kb  
264 window) and central coverage ( $\pm 30$  bp) in the ctDNA for ARPC PDX lines (mean central  
265 coverage  $0.75$ ,  $n=16$ ) compared to NEPC lines (mean  $0.96$ ,  $n=6$ ) and cfDNA from healthy human  
266 donors (mean  $0.97$ ,  $n=14$ ) (**Figure 4B, Supplementary Table S3**). Conversely, for NEPC-specific  
267 open chromatin sites, coverage was decreased in ctDNA for NEPC lines (mean  $0.89$ ) compared  
268 to ARPC lines (mean  $1.01$ ) and healthy donors cfDNA (mean  $1.00$ ) (**Figure 4C, Supplementary**  
269 **Table S3**). These results confirmed that tumor tissue chromatin accessibility can be corroborated  
270 in ctDNA and that ARPC and NEPC phenotypes have distinct ctDNA composite site coverage  
271 profiles.

### 272 **Comprehensive evaluation of ctDNA features across genomic contexts for CRPC** 273 **phenotype classification**

274 To assess the utility of ctDNA nucleosome profiling for informing prostate cancer phenotype  
275 classification, we systematically evaluated four groups of global genome-wide ctDNA features:  
276 phasing, fragment sizes, local coverage profiling, and composite site coverage profiling (**Figure**  
277 **1A**). From principal components analysis (PCA), we observed distinct feature signals between  
278 ARPC and NEPC phenotypes for composite TFBS coverage of TFs, NPS of 47 phenotype marker

279 genes, and fragment size variability at global sites of PTMs (**Figure 4D, Supplementary Fig.**  
280 **S9A, Supplementary Table S4, Methods**). In addition to these features, we also included similar  
281 approaches previously reported, including short-long fragment ratio and local coverage patterns  
282 at the TSS (max wave height between -120bp to 195bp) (30,40) (**Methods**).

283 We quantitatively evaluated all combinations of coverage, phasing, and fragment size features  
284 for different genomic contexts to investigate their potential to classify ARPC and NEPC  
285 phenotypes. For each feature set, we conducted 100 iterations of stratified cross-validation using  
286 a supervised machine learning classifier (XGBoost) on ctDNA samples from the 16 ARPC and 6  
287 NEPC models and computed the area under the receiver operating characteristic curve (AUC)  
288 (**Methods**). First, we evaluated an established set of 10 genes associated with AR activity (5,12).  
289 We observed that the phased nucleosome distance at H3K27ac sites and the central coverage  
290 at TSSs had moderate predictive performance (AUC 0.88) (**Supplementary Fig. S9B,**  
291 **Supplementary Table S4**). For the set of 47 phenotype markers, the NPS of gene bodies was  
292 most predictive (AUC 0.98) (**Supplementary Fig. S9C Supplementary Table S4**). When  
293 considering all PTM sites, promoters, genes, TFs, and open chromatin regions, the best  
294 performing features included mean fragment size at H3K4me1 sites (n=9,750, AUC 1.0) and  
295 promoter TSSs (n=17,946, AUC 1.0), and both open chromatin composite site features (AUC 1.0)  
296 (**Figure 4E, Supplementary Table S4**).

### 297 **Accurate classification of ARPC and NEPC phenotypes from patient plasma using a** 298 **probabilistic model informed by PDX ctDNA analysis**

299 An important consideration and challenge in analyzing plasma from patients is the presence of  
300 cfDNA released by hematopoietic cells, which leads to a lower ctDNA fraction (i.e., tumor fraction).  
301 Furthermore, the small patient cohorts with available tumor phenotype information make  
302 supervised machine learning approaches suboptimal. Therefore, we developed ctdPheno, a  
303 probabilistic model to estimate the proportion of ARPC and NEPC from an individual plasma  
304 sample, accounting for the tumor fraction (**Methods**). We focused on the phenotype-specific open  
305 chromatin composite site features and used the PDX plasma ctDNA signals (**Figure 4B-C,**  
306 **Supplementary Table S3**) to inform the model. The model produces a normalized prediction  
307 score that represents the estimated signature of ARPC (lower values) and NEPC (higher values).  
308 We applied this method to benchmarking datasets generated by simulating varying tumor  
309 fractions and sequencing coverages using five ARPC and NEPC PDX ctDNA samples each  
310 (**Figure 4F, Methods**). We achieved a 1.0 AUC at 25X coverage down to 0.01 tumor fraction, 1.0

311 AUC at 1X down to 0.2 tumor fraction, and 1.0 AUC at 0.2x coverage at 0.3 tumor fraction,  
312 suggesting a possible upper-bound performance for classifying samples with lower tumor fraction  
313 in plasma (**Figure 4G, Supplementary Table S4**).

314 To test the classification performance of the model on patient samples, we analyzed a published  
315 dataset of ultra-low-pass whole genome sequencing (ULP-WGS) of plasma cfDNA (mean  
316 coverage 0.52X, range 0.28-0.92X) from 101 mCRPC patients comprising 80 adenocarcinoma  
317 (ARPC) and 21 NEPC samples (DFCI cohort I) (25). Using the model, which was unsupervised  
318 and used parameters informed only by the PDX analysis, we achieved an overall AUC of 0.96  
319 (**Figure 5A, Supplementary Table S5**). When considering samples with high ( $\geq 0.1$ ) and low ( $< 0.1$ )  
320 tumor fraction, the model had an 0.97 AUC and 0.76 AUC, respectively (**Supplementary Fig.**  
321 **S10A**). We identified an optimal overall performance at 97.5% specificity (ARPC) and 90.4%  
322 sensitivity (NEPC) which corresponded to the prediction score of 0.3314 (**Figure 5A**). These  
323 results were concordant (92.1%) with phenotype classification by cfDNA methylation on the same  
324 plasma samples (**Supplementary Fig. S10B, Supplementary Table S5**). In another published  
325 dataset of 11 mCRPC samples from 6 patients who had high PSA, treatment with ARSI, or both  
326 (DFCI cohort II) (67,68), the model correctly classified patients as ARPC in 11 (100%) WGS  
327 ( $\sim 20x$ ) and 8 (73%) ULP-WGS ( $\sim 0.1x$ ) samples when using the optimal score cutoff (**Figure 5B,**  
328 **Supplementary Table S5**).

329 Next, we analyzed 61 clinical plasma samples from 30 CRPC patients with ARPC, NEPC, and  
330 mixed phenotypes that are representative of typical clinical histories (**Supplementary Table S5**).  
331 We performed ULP-WGS of cfDNA and selected 47 samples from 30 patients (26 ARPC, 5 NEPC,  
332 and 16 mixed phenotypes) based on tumor fraction and AR copy number status and performed  
333 deeper WGS (mean 22.13X coverage, range 15.15X – 31.79X) (**Supplementary Table S5,**  
334 **Methods**). For the 26 samples with ARPC clinical phenotype, we predicted all to be predominantly  
335 ARPC using the score cutoff of 0.3314 (**Figure 5C**). For NEPC clinical phenotype, all five were  
336 predicted to be NEPC with scores above the cutoff. We also noted a negative association between  
337 the patient ctDNA coverage at open chromatin sites and the tumor fraction for both ARPC  
338 (Spearman's  $r = -0.93$ ) and NEPC predictions (Spearman's  $r = -1.00$ ), suggesting that the  
339 observed ctDNA signals were likely tumor-specific (**Supplementary Fig. S10C**). From ULP-WGS  
340 data, we correctly predicted 22 (84%) samples with ARPC clinical phenotype and all five (100%)  
341 samples with NEPC clinical phenotype (**Figure 5C**). The remaining 16 samples had clinical  
342 histories or tumor histologies that reflected mixed phenotypes such as a tumor with AR-positive  
343 adenocarcinoma intermixed with NEPC (**Figure 5C, Supplementary Table S5, Supplementary**

344 **Fig. S11**). For 12 samples that included presence of ARPC in the mixed clinical phenotype, 10  
345 (83%) were classified as ARPC at the optimal score cutoff. For all three samples that had  
346 presence of NEPC but no ARPC in the clinical phenotype, the model classified them as NEPC  
347 (**Supplementary Fig. S12**). Overall, we achieved an accuracy of 100% for WGS (87% for ULP-  
348 WGS) data for samples with unambiguous clinical phenotypes. However, the variable predictions  
349 for mixed or ambiguous phenotypes underscore the complexities associated with classification in  
350 patients with advanced prostate cancer where tumor heterogeneity can be observed.

## 351 **DISCUSSION**

352 To our knowledge, we present the largest sequencing study to date of human ctDNA from mouse  
353 plasma of PDX models. The sequencing of mouse plasma provided a unique opportunity to  
354 comprehensively interrogate the epigenetic nucleosome patterns in ctDNA from well-  
355 characterized tumor models. We developed and applied computational methodologies to  
356 construct a multitude of ctDNA features, each of which were associated with the transcriptional  
357 regulation in the LuCaP PDX models across CRPC tumor phenotypes. Using features learned  
358 from the PDX ctDNA, we developed a probabilistic model to accurately classify ARPC and NEPC  
359 phenotypes from patient plasma in three clinical cohorts.

360 The use of PDX mouse plasma overcomes the challenge of low ctDNA content or incomplete  
361 knowledge of the tumor when studying patient samples and can expedite development of cfDNA  
362 diagnostics, basic cancer research, and clinical translation. Furthermore, the LuCaP ctDNA  
363 sequencing data complements the maturing characterization of CRPC tumor phenotypes from  
364 tissue. In addition to supporting molecular studies of CRPC, the ctDNA data and our approaches  
365 expand on the potential utility of PDX models for translational research. While these data were  
366 focused on ARPC and NEPC phenotypes, this study may serve as a framework for the use of  
367 PDX plasma from additional CRPC phenotypes and other cancers models.

368 The analysis of the LuCaP PDX ctDNA sequencing data confirmed the activity of key regulators  
369 between ARPC and NEPC phenotypes, including a set of 47 established differentially expressed  
370 gene markers. While gene expression inference from ctDNA has been shown in proof-of-concept  
371 studies (34,40), the PDX ctDNA allowed for a detailed dissection of nucleosome organization  
372 associated with transcriptional activity of individual genes that define the tumor phenotypes.  
373 Previous analytical approaches have profiled nucleosome occupancy from cfDNA (37,66).  
374 However, our assessment of nucleosome stability by means of the Nucleosome Phasing Score

375 is the first to capture the highly variable spacing and position of the nucleosome arrays associated  
376 with transcription and tumor aggressiveness (42,62,69).

377 In addition to the existing molecular profiling available for these models, we now provide  
378 characterization of histone PTMs in LuCaP PDX tumors using CUT&RUN. At regions with these  
379 PTMs on histone tails, we observed expected nucleosome patterns inferred in ctDNA that were  
380 consistent with active or repressed gene transcription. To our knowledge, this is the first time that  
381 ctDNA analysis has been performed in the context of histone PTMs and will provide a blueprint  
382 to develop new approaches for studying additional epigenetic alterations using PDX plasma.

383 While the regulation of key factors such as AR, HOXB13, NKX-3.1, FOXA1, and REST has been  
384 shown from ctDNA in CRPC (41), we report the differential activity of other key factors in CRPC  
385 for the first time from ctDNA analysis. This included the glucocorticoid receptor (NR3C1), nuclear  
386 factors HNF4G and HNF1A, and pioneering factors GATA2 and GATA3, all of which are  
387 associated with prostate adenocarcinoma (ARPC) (63,65,70). ASCL1 is a pioneer TF with roles  
388 in neuronal differentiation and was recently described to be active during NE trans-differentiation  
389 and in NEPC (9,53). To our knowledge, this study is the first to demonstrate ASCL1 binding site  
390 accessibility and provide a detailed characterization of its transcriptional activity in NEPC from  
391 plasma ctDNA.

392 We show an expansive analysis of TFBSs for 338 factors in each plasma sample without the need  
393 for chromatin immunoprecipitation or other epigenetic assays. However, we did not find a  
394 significant difference in accessibility for 69 out of the 107 TFs in ctDNA, which may be consistent  
395 with TF activity not necessarily being correlated with its own expression levels (71). On the other  
396 hand, the accessibility of TFBSs may not necessarily indicate true TF activity, such as binding of  
397 multiple factors to the same locus. Moreover, our analysis was based on TFBSs obtained from  
398 public databases; however, prostate phenotype-specific TF cistromes can better guide this  
399 approach.

400 We applied state-of-the-art computational approaches built on existing and new concepts of  
401 ctDNA data analysis to extract tumor-specific features, including the representation of  
402 nucleosome phasing, periodicity, and spacing associated with transcriptional activity. Other  
403 approaches have also considered regions, such as TSSs, TFBSs, and DNase hypersensitivity  
404 sites (33,37,40,41); however, after a systematic evaluation, we found that ctDNA features in open  
405 chromatin sites derived from ATAC-Seq of PDX tissue (9) provided the highest performance for

406 distinguishing CRPC phenotypes. We presented ctdPheno which is an unsupervised probabilistic  
407 model that estimates the proportion of ARPC and NEPC in patient plasma using a statistical  
408 framework informed by idealized parameters from the LuCaP PDX ctDNA analysis. This model  
409 does not require training on patient samples but does require tumor fraction estimates (ichorCNA  
410 (72)) and a prediction score cutoff determined from DFCI cohort I. Another current limitation is the  
411 prediction of only ARPC and NEPC phenotypes; however, the framework can be extended to  
412 model multiple phenotype classes, provided the informative parameters for these additional states  
413 can be learned. Insights from additional datasets such as single-cell nucleosome and accessibility  
414 profiling (73,74) of PDX tumors and clinical samples may improve the resolution for ctDNA  
415 analysis.

416 Applying the prediction model to patient datasets with definitive clinical phenotypes yielded high  
417 performance despite using low depth of coverage sequencing. In particular, our performance for  
418 the DFCI cohort I was also consistent with the reported phenotype classification results using  
419 ctDNA methylation in the same patients (25). Similarly, in the UW cohort, samples with well-  
420 defined clinical phenotypes had perfect concordance from deep WGS data. However, samples  
421 with mixed or ambiguous clinical phenotypes limited our ability to definitively assess the  
422 performance of the model because a subset of cases had complex clinical and histopathological  
423 features. Tumor heterogeneity and co-existence of different molecular phenotypes are common  
424 in mCRPC where treatment-induced phenotypic plasticity may vary within and between tumors in  
425 an individual patient. Larger studies with comprehensive assessment of the tumor histologies will  
426 be needed for developing future extensions of the model to predict mixed phenotypes from ctDNA.

427 In summary, this study illustrates for the first time that analysis of ctDNA from PDX mouse plasma  
428 at scale can facilitate a more detailed investigation of tumor regulation. These results, together  
429 with the suite of computational methods presented here, highlight the utility of ctDNA for surveying  
430 transcriptional regulation of tumor phenotypes and its potential diagnostic applications in cancer  
431 precision medicine.

## 432 **ACKNOWLEDGEMENTS**

433 We thank the many patients and their families for their altruistic contributions to this study. We  
434 thank the Fred Hutchinson Cancer Research Center Genomics Shared Resources Core members,  
435 the Institute for Prostate Cancer Research clinicians and staff that support the University of  
436 Washington rapid autopsy program and the PDX program. We thank Patricia Galipeau and



437 members of the Ha and Nelson Laboratories for critically reading this manuscript. We also thank  
438 Srinivas Ramachandran for critical discussion and helpful advice in the preliminary phases of this  
439 work.

#### 440 **AUTHOR CONTRIBUTIONS**

441 Conceptualization: N.D.S., R.D.P., G.H., P.S.N.

442 Methodology: N.D.S., R.D.P., A-L.D., P.S.N., G.H.

443 Software: R.D.P., A-L.D., N.D.S., B.H., A.J.K., G.H.

444 Formal Analysis: R.D.P., N.D.S., A-L.D., B.H., A.J.K., M.K., M.A., I.C., G.H.

445 Investigation: N.D.S., R.D.P., A-L.D., B.H., J.F.S., J.M.L., A.B., G.H.

446 Resources: N.D.S., J.S., S.B., M.P.M., D.H.J., L.A.A., R.F.D., T.A.N., H.M.M., S.C.B., J.E.B.,  
447 M.L.F., C.M., H.M.N., E.C., S.H., P.S.N., G.H.

448 Data Curation: N.D.S., R.D.P., A-L.D., M.P.M., S.B., D.H.J., E.C., C.M., A.D.C., M.C.H., P.S.N.,  
449 G.H.

450 Writing – Original Draft: R.D.P., N.D.S., P.S.N., G.H.

451 Writing – Review & Editing: N.D.S., R.D.P., A-L.D., C.C.P., C.M., A.D.C., M.T.S., B.M., M.C.H.,  
452 E.C., K.A., S.H., P.S.N., G.H.

453 Visualization: R.D.P., N.D.S., B.H., M.K., M.C.H., P.S.N., G.H.

454 Supervision: P.S.N., G.H.

455 Funding Acquisition: G.H., P.S.N.

## 456 **MATERIALS AND METHODS**

### 457 ***PDX mouse models***

458 The establishment and characterization of the LuCaP PDX models were described previously  
459 (75). PDXs were propagated in vivo in male NOD-scid IL2R-gamma-null (NSG) mice  
460 (cat#005557). The collection of tumors for the establishment of PDX lines was approved by the  
461 University of Washington Human Subjects Division IRB (IRB #2341). PDX lines were evaluated  
462 using histopathology by at least two expert pathologists, and histological phenotypic subtype  
463 annotations were orthogonally validated based on transcriptome-derived signature marker  
464 expression scores to define phenotypes (4,5,22): adenocarcinoma AR-positive (ARPC),  
465 neuroendocrine positive (NEPC), and AR-low, neuroendocrine negative (ARLPC). Resected PDX  
466 tumors (300-800 mm<sup>3</sup>) were divided into ~50mg to ~100mg pieces and stored at -80°C. Animal  
467 studies were approved by the Fred Hutchinson Cancer Research Center (FHCR) IACUC  
468 (protocol 1618) and performed in accordance with the NIH guidelines. For the current study, blood  
469 was collected by cardiac puncture from animals bearing PDX tumors (measurable size 300-800  
470 mm<sup>3</sup>).

### 471 ***Human subjects***

472 UW cohort: Blood samples were collected from men with metastatic castration resistant prostate  
473 cancer at the University of Washington (collected under University of Washington Human  
474 Subjects Division IRB protocol number CC6932 between years 2014-2021). In this study, 61  
475 plasma samples from 30 patients were analyzed. After initial ultra-low pass whole genome  
476 sequencing (ULP-WGS) analysis, 47 plasma samples from 30 patients were retained for further  
477 high depth of coverage whole genome sequencing (WGS) analysis. All samples were de-  
478 identified prior to ctDNA analysis and we employed a double blinded approach for evaluating  
479 clinical phenotype predictions.

480 DFCI cohort I: Plasma was collected from men diagnosed with mCRPC and treated at the Dana-  
481 Farber Cancer Institute (DFCI), Brigham and Women's Hospital, or Weill Cornell Medicine (WCM)  
482 between April 2003 and August 2021. All patients provided written informed consent for research  
483 participation and genomic analysis of their biospecimen and blood. The use of samples was  
484 approved by the DFCI IRB (#01-045 and 09-171) and WCM (1305013903) IRBs. ULP-WGS data  
485 at mean coverage 0.5x (range 0.3x – 0.9x) for 101 patients were published previously (25).

486 DFCI cohort II: Plasma samples in this cohort were collected from men diagnosed with mCRPC  
487 and treated at the Dana-Farber Cancer Institute (DFCI). All patients provided written informed  
488 consent for blood collection and the analysis of their clinical and genetic data for research  
489 purposes (DFCI Protocol # 01-045 and 11-104). WGS data at mean coverage 27x (range 11x –  
490 44x) (67), and ULP-WGS data at mean coverage 0.13x (range 0.07x – 0.18x) (68,72) were  
491 downloaded from dbGAP accession phs001417. Eleven samples from six patients had matching  
492 WGS and ULP-WGS with paired-end reads, necessary for analysis by Griffin. Prostate specific  
493 antigen (PSA, ng/mL) values and treatment at the time of the blood draw were previously  
494 published (68). The six patients were treated for adenocarcinoma using Abiraterone,  
495 Enzalutamide, or Bicalutamide, or the patients had detectable levels of PSA.

496 Healthy donor plasma cfDNA WGS data used in this study were obtained from previously  
497 published studies. Two samples (HD45 and HD46) with coverage of 13x and 15x, respectively,  
498 were accessed from dbGAP under accession phs001417 (67,72). These donors were consented  
499 under DFCI protocol IRB (# 03-022). Thirteen healthy donor plasma cfDNA WGS data (12 male:  
500 NPH002, 03, 06, 07, 12, 18, 23, 26, 33, 34, 35, 36; 1 female (used in admixtures): NPH004) with  
501 coverages between 13.5x – 27.6x were obtained from the European Phenome Archive (EGA)  
502 under accession EGAD00001005343 (41).

### 503 ***PDX plasma processing***

504 Blood samples were collected from NSG mice bearing subcutaneous PDX tumors at the time of  
505 sacrifice. The PDX lines were maintained at vivaria in the University of Washington and FHCRC.  
506 The blood was processed following methods described for human plasma DNA processing for  
507 subsequent DNA isolation. Blood was collected in purple cap EDTA tubes and processed within  
508 4 hours. All blood samples were double spun using centrifugation at 2500g for 10 minutes followed  
509 by a 16000g spin of the plasma fraction for 10 minutes at room temperature. For each PDX line,  
510 7-10 mouse plasma samples were pooled. Processed plasma samples were preserved in clean,  
511 screw-capped cryo-microfuge tubes and stored at -80°C prior to cfDNA isolation.

### 512 ***Cell-free DNA isolation***

513 The QIAamp Circulating Nucleic Acid Kit was used to isolate cfDNA from PDX mouse-derived  
514 plasma using the recommended protocol. The pooled plasma samples from 7-10 mice for each  
515 PDX line contained ~2-3 mL total plasma volume for each line. The filter retention-based cfDNA  
516 kit method does not implement any fragment size class enrichment. Isolated cfDNA was

517 quantified using the Qubit dsDNA HS assay (Invitrogen) and the cfDNA fragment size profiles  
518 were analyzed using TapeStation HS D5000 and HS D1000 assays (Agilent).

### 519 ***Cell-free DNA library preparation and sequencing***

520 For LuCaP PDX mouse plasma samples, NGS libraries were prepared with 50ng input cfDNA.  
521 Illumina NGS sequencing libraries were prepared with the KAPA hyperprep kit, adopting nine  
522 cycles of amplification, and purified using lab standardized SPRI beads. We used KAPA UDI dual  
523 indexed library adapters. Library concentrations were balanced and pooled for multiplexing and  
524 sequenced using the Illumina HiSeq 2500 at the Fred Hutch Genomics Shared Resources (200  
525 cycles) and Illumina NovaSeq platform at the Broad Institute Genomics Platform Walkup-Seq  
526 Services using S4 flow cells (300 cycles). To match with Illumina HiSeq 2500 data, truncated 200  
527 cycles FASTQ files were generated (100 bp paired end reads).

528 Clinical patient plasma samples collected at University of Washington (UW cohort) were  
529 submitted to the Broad Institute Blood Biopsy Services. Briefly, cfDNA was extracted from 2 mL  
530 double-spun plasma and ultra-low-pass whole genome sequencing (ULP-WGS) to approximately  
531 0.2x coverage was performed. The ichorCNA pipeline was used to estimate tumor DNA content  
532 (i.e., tumor fraction, see below). Forty-seven samples (from 30 patients) had either  $\geq 5\%$  tumor  
533 fraction or  $\geq 2\%$  tumor fraction with AR amplification observed in ichorCNA and were subsequently  
534 sequenced to deeper WGS coverage ( $\sim 20x$ ).

### 535 ***Cell-free DNA sequencing analysis and mouse subtraction***

536 All cfDNA sequencing data used in this study were realigned to the hg38 human reference  
537 genome (<http://hgdownload.soe.ucsc.edu/goldenPath/hg38/bigZips/hg38.fa.gz>). FASTQ files  
538 were realigned using BWA (v0.7.17) mem (76). The complete alignment pipeline including  
539 configuration settings may be access at  
540 [https://github.com/GavinHaLab/fastq\\_to\\_bam\\_paired\\_snakemake](https://github.com/GavinHaLab/fastq_to_bam_paired_snakemake).

541 For PDX ctDNA whole-genome sequence data, we performed mouse genome subtraction  
542 following the protocol described previously (77), wherein reads were aligned using BWA mem to  
543 a concatenated reference consisting of both human (hg38) and mouse (mm10, GRCm38.p6,  
544 [http://igenomes.illumina.com.s3-website-us-east-  
545 1.amazonaws.com/Mus\\_musculus/NCBI/GRCm38/Mus\\_musculus\\_NCBI\\_GRCm38.tar.gz](http://igenomes.illumina.com.s3-website-us-east-1.amazonaws.com/Mus_musculus/NCBI/GRCm38/Mus_musculus_NCBI_GRCm38.tar.gz))  
546 reference genomes. Read pairs where both reads aligned to the human reference genome were  
547 retained and all other read pairs were removed. Then, remaining reads were re-aligned to the

548 human-only reference. Finally, the GATK best practices workflow was applied to each sample  
549 (78); the complete mouse subtraction pipeline used in this study, including tool versions and  
550 parameters, can be accessed at [https://github.com/GavinHaLab/PDX\\_mouseSubtraction](https://github.com/GavinHaLab/PDX_mouseSubtraction).  
551 Following mouse subtraction samples with < 3X depth were removed for downstream analysis.

### 552 ***Cell cycle progression (CCP) score calculation***

553 The 31-gene cell cycle proliferation (CCP) signature (62) was computed from RNAseq data using  
554 GSEA (79). The single-sample enrichment scores were calculated with default parameters using  
555 genome-wide log<sub>2</sub> FPKM values as input for the 31 genes.

### 556 ***Differential mRNA expression analysis***

557 RNA isolation of 102 tumors from 46 LuCaP PDX samples was performed as described previously  
558 (11). RNA concentration, purity, and integrity was assessed by NanoDrop (Thermo Fisher  
559 Scientific Inc) and Agilent TapeStation and RNA RIN  $\geq 8$  was retained for library preparation.  
560 RNA-Seq libraries were constructed from 1 ug of total RNA using the Illumina TruSeq Stranded  
561 mRNA LT Sample Prep Kit according to the manufacturer's protocol. Barcoded libraries were  
562 pooled and sequenced by Illumina NovaSeq 6000 or Illumina HiSeq 2500 generating 50 bp paired  
563 end reads. Sequencing reads were mapped to the hg38 human reference genome and mm10  
564 mouse reference genomes using STAR.v2.7.3a (80). All subsequent analyses were performed in  
565 R-4.1.0. Sequences aligning to the mouse genome and therefor derived from potential  
566 contamination with mouse tissue were removed from the analysis using Xenofilter (v1.6) (81).  
567 Gene level abundance was quantitated using the R package GenomicAlignments v1.32.0  
568 summarizeOverlaps function using mode=IntersectionStrict, restricted to primary aligned reads.  
569 We used refSeq gene annotations for transcriptome analysis. Transcript abundances (FPKM)  
570 were input to edgeR v3.38.1 (82), filtered for a minimum expression level using the filterByExpr  
571 function with default parameters, and then limma v3.52.1 voom was used for differential  
572 expression analysis of NEPC vs. ARPC and ARLPC vs. ARPC. We then filtered the results using  
573 a list of 1,635 human transcription factors published previously (83), which resulted in 514 genes  
574 with FDR<0.05 and fold change > 3. Out of these 514, deregulation of gene expression for 404  
575 transcription factor genes delineated ARPC from NEPC.

### 576 ***Cleavage Under Targets & Release Using Nuclease (CUT&RUN)***

577 CUT&RUN is an antibody targeted enzyme tethering chromatin profiling assay in which controlled  
578 cleavage by micrococcal nuclease releases specific protein-DNA complexes into the supernatant  
579 for paired-end DNA sequencing analysis. We performed CUT&RUN assays for three histone

580 modifications, H3K27ac, H3K4me1, and H3K27me3, according to published protocols (46). We  
581 performed CUT&RUN on LuCaP PDX tumors using ~75mg flash-frozen tissue pieces.

582 Paired-end (50 bp) sequencing was performed and reads were aligned using bowtie2 v2.4.2 (84)  
583 to the hg38 human reference assembly. Aligned reads were processed as described in the  
584 SEACR protocol (<https://github.com/FredHutch/SEACR#preparing-input-bedgraph-files>). Peaks  
585 were called using SEACR version 1.3 (47) using "stringent" settings and with reference to paired  
586 IgG controls. BigWig files were prepared using bamCoverage in deepTools 3.5.0 (85).  
587 Genomewide peak heatmap, targeted heatmap, and respective profiles were plotted using  
588 deepTools v3.5.0. bigwig formatted files for each phenotype were obtained using the mean  
589 function in wiggletools 1.2.8. and deepTools computeMatrix. Phenotype-specific informative  
590 region coordinates were obtained from diffBind v3.5.0, and the top 10,000 most significant regions  
591 (all with FDR < 0.05) differentially open between ARPC and NEPC lines were used for  
592 downstream feature analyses (see Gene body and promoter region selection for additional  
593 subsetting criteria applied on a feature-by-feature basis). For heatmaps and profiles the  
594 plotHeatmap function was used. We utilized the "Peak Center" option to derive desired heatmaps.  
595 These steps were all performed for H3K27ac, H3K4me1 and H3K27me3 antibodies. Scaled  
596 heatmap profiles' area under the curve (AUC) and peak height at the profile center were estimated  
597 using deepStats v0.4 (86) (comparable profiles are scaled to 10 units).

### 598 ***Differential histone post-translational modification (PTM) analysis***

599 Differential PTM analysis was performed with the Diffbind version 2.16.0 package (87) in R-4.0.1  
600 using standard parameters (<https://bioconductor.riken.jp/packages/3.0/bioc/html/DiffBind.html>).  
601 ARPC, NEPC and ARLPC samples were grouped by histopathological and transcriptome  
602 signature defined phenotypes described in the "PDX mouse models" section (Supplementary  
603 Table S2A). Samples were loaded with the dba function, reads counted with the dba.count  
604 function, and contrast specified as phenotype with dba.contrast and a minimum members of 2.  
605 Differential peak sites were computed with the dba.analyze function with default settings.  
606 Differential peak binding of NEPC and ARLPC was computed against ARPC samples. Unique  
607 binding sites in NEPC and ARLPC were catalogued using bedtools v2.29.2 (88). Intergroup  
608 differentially bound peaks were annotated using ChIPseeker 1.28.3 (89) and  
609 TxDb.Hsapiens.UCSC.hg38.knownGene 3.2.2 in R 4.1.0.

## 610 ***ATAC-Seq analysis***

611 ATAC-Seq sequence data for 15 tumor samples from 10 PDX lines were published previously (9).  
612 These lines included LuCaP PDX lines with ARPC histology (23.1, 77, 78, 81, 96) and NEPC  
613 histology (two replicates each of 49, 93, 145.1, 173.1 and one replicate of 145.2). Paired end  
614 reads were aligned using bowtie2 v2.4.2 (84) to the UCSC hg38 human reference assembly with  
615 the "very-sensitive" "-k 10" settings. Peaks were called using Genrich version 0.6.1  
616 (<https://github.com/jsh58/Genrich>). Differential binding analysis was performed using Diffbind  
617 version 3.5.0 package in R version 4.1.0. ENCODE blacklisted regions were excluded using hg38-  
618 blacklist.v2 (90) (<https://github.com/Boyle-Lab/Blacklist>). Phenotype specific binding sites were  
619 isolated by first selecting for positive fold change open chromatin enrichment and then using  
620 Intervene 0.6.5 (91) where regions were considered overlapping if they shared at least 1 bp.  
621 Regions with FDR adjusted p-values < 0.05 were then subset to those overlapping the 338,000  
622 established TFBSs (338 TFs x 1,000 binding sites, see Griffin analysis for site selection) by at  
623 least 1 bp using BedTools v2.30.0 Intersect. Only regions that overlapped an established TFBS  
624 were retained.

## 625 ***Nucleosome profiling of ctDNA***

626 Griffin is a method for profiling nucleosome protection and accessibility on predefined genomic  
627 loci (49). Griffin filters sites by mappability, estimates and corrects GC bias on a per fragment  
628 level, and generates GC-corrected coverage profiles around each site. First, griffin takes a site  
629 list and examines the mappability in a window (+/- 5000 bp around each site). Mappability (hg38  
630 Umap multi-read mappability for 50bp reads) was obtained from UCSC genome browser (92)  
631 (<https://hgdownload.soe.ucsc.edu/gbdb/hg38/hoffmanMappability/k50.Umap.MultiTrackMappability.bw>). Sites with <0.95 mappability were excluded from further analysis. Next, GC bias was  
633 quantified for each sample using a modified version of the approach described previously (93).  
634 Briefly, for each possible fragment length and GC content, the number of reads in a bam file and  
635 the number of genomic positions with that specific length and GC content were counted. The GC  
636 bias for each fragment length and GC content was calculated by dividing the number of observed  
637 reads by the number of observed genomic positions for that fragment length and GC content. The  
638 GC bias for all possible GC contents at a given fragment length was then normalized to a mean  
639 bias of 1. GC biases were then smoothed by taking the median of values for fragments with similar  
640 lengths and GC contents (k nearest neighbors smoothing) to generate smoothed GC bias values.

641 After GC correction, nucleosome profiling was performed in each sample. For each mappable site  
642 of interest, fragments aligning to the region  $\pm 5000$  bp from the site were fetched from the bam  
643 file. Fragments were filtered to remove duplicates and low-quality alignments ( $<20$  mapping  
644 quality) and by fragment length. Nucleosome size fragments (140-250 bp) were retained.  
645 Fragments were then GC corrected by assigning each fragment a weight of  $1/\text{GC\_bias}$  for that  
646 given fragment length and GC content and the fragment midpoint was identified. The number of  
647 weighted fragment midpoints in 15bp bins across the site were counted. For composite sites, all  
648 sites of a given type (such as all sites for a given transcription factor) were summed together to  
649 generate a single coverage profile. Individual or composite coverage profiles were normalized to  
650 a mean coverage of 1 in the  $\pm 5000$ bp region surrounding the site. Finally, sites were smoothed  
651 using a Savitsky-Golay filter with a window length of 165bp and a polynomial order of 3. The  
652 window  $\pm 1000$  bp around the site was retained for plotting and feature extraction (See Griffin  
653 manuscript for further details); when plotting sites, shading illustrates the 95% confidence interval  
654 within sample groups. Features extracted from individual or composite sites included:

- 655 a) “mean central coverage,” the mean coverage between -30 to 30 bp relative to the site  
656 center,
- 657 b) “mean window coverage,” the mean coverage between -990 to 990 bp relative to the site  
658 center, and
- 659 c) “max wave height,” the absolute difference between the minimum coverage within the  
660 window from -120 to 30 bp and maximum coverage in the window from 31 to 195 bp  
661 relative to the TSS.

### 662 ***Analysis of selective transcription factor binding sites (TFBS)***

663 Transcription factor binding site (TFBS) Griffin analysis was conducted with the same TFBS list  
664 utilized in Griffin (49). After intersecting these 338 with 404 differentially expressed TFs identified  
665 through RNA-Seq 107 remained, on which we performed unsupervised hierarchical clustering of  
666 central window mean values (see Griffin analysis). Hierarchical clustering was performed using  
667 the Ward.D2 method with Euclidean distance and complete linkage settings; the groupings were  
668 determined using `cutree_cols=2` for columns (LuCaP CRPC phenotypes) and `cutree_rows=13` for  
669 rows (TFs) on the dendrograms.

### 670 ***Gene body and promoter region selection***

671 For individual gene body and promoter analyses Ensembl BioMart v104 (hg38) (94) was used to  
672 directly retrieve protein coding transcript start (TSS) and end (TES) coordinates. For promoter



673 region analysis the window  $\pm 1000$  bp relative to the TSS was considered. For gene body analysis,  
674 the region between the TSS and TES was considered. In the case of genes with multiple  
675 transcripts, analyses were limited to the longest transcript resulting in 19,336 regions. In  
676 downstream analysis of LuCaP PDX cfDNA, if any lines did not meet specific criteria in a region  
677 (including differentially open histone modification regions) that feature/region combination was  
678 excluded from analysis, leading to a variable lower number of regions considered based on the  
679 feature. These criteria included requiring at least 10 total fragments in a region for all Fragment  
680 size analysis (see below) and a non-zero number of “short” and “long” fragments for the short-  
681 long ratio; short-long ratios less than 0.01 or greater than 10.0 were also excluded as outliers. For  
682 Phasing analysis (see below) we also excluded amplitude components and thus NPS where  
683 individual components were 0, or where the ratio was less than 0.01 or greater than 10.0,  
684 indicative of insufficient coverage. In the case of mean phased nucleosome distance, if no peaks  
685 were identified or the value in a region exceeded 500 (indicative of highly irregular/sparse pileups  
686 also from low coverage) those regions were also excluded. Any region with no coverage in a line  
687 was excluded from all analyses. This resulted in gene lists that differed in numbers between  
688 genomic contexts and feature types.

### 689 ***Fragment size analysis***

690 Fragments were first filtered to remove duplicates and low-quality alignments (<20 mapping  
691 quality) and by fragment length (15-500 bp). In individual genomic loci/windows, we computed  
692 the fragment short-long ratio (FSLR) as the ratio of short (15 - 120 bp) to long (140 - 250 bp)  
693 fragments. We also calculated the mean, median absolute deviation (MAD:  $median(|X_i - median(X)|)$ ),  
694 and coefficient of variation (CV:  $\frac{\sigma}{\mu}$  where  $\sigma$  = standard deviation,  $\mu$  = mean) of the  
695 fragment length distribution for each selected window. The fragment size analysis code and  
696 implementation used in this study can be accessed at  
697 <https://github.com/GavinHaLab/CRPCSubtypingPaper/tree/main/FragmentAnalysis>.

### 698 ***Nucleosome phasing analysis (TritonNP)***

699 Fragments were first filtered to remove duplicates and low-quality alignments (<20 mapping  
700 quality) and by fragment length (nucleosome-sized: 140-250 bp). Next we performed fragment-  
701 level GC bias correction utilizing the same pre-processing method defined in Griffin. A band-pass  
702 filter was then applied to the corrected coverage in each region of interest by taking the Fast  
703 Fourier Transform (FFT) (scipy.fft v1.8.0) (95) and removing high-frequency components  
704 corresponding to frequency components < 146 bp before reconstructing the signal. This cutoff

705 was chosen to ensure that periodic fit signal for downstream evaluation must come from the  
706 minimum possible inter-nucleosome distance, thus excluding peak pileups that would not indicate  
707 an overall trend in nucleosome phasing. Local peak calling was then done on the smoothed signal  
708 to infer average inter nucleosome distance or “phased nucleosome distance” by finding maxima  
709 directly. To quantify clarity of overall phasing we took the average frequency amplitude in two  
710 bands corresponding to a core + linker (180-210 bp) and core only (150-180 bp), with the former  
711 measuring the strength of typically aligned nucleosomes and the latter giving a measure of the  
712 underlying signal strength not coming from either high frequency noise or low frequency shifts in  
713 total coverage. The ratio of these two amplitude averages forms the Nucleosome Phasing Score  
714 (NPS). Because peak locations are assumed to be independent of copy number alterations or  
715 depth, and the NPS by virtue of being a ratio divides out any confounding DNA/depth variation  
716 between sites, both features are taken as agnostic of CNAs or variable depth. Code and  
717 implementation of the method can be found at <https://github.com/denniepatton/TritonNP>.

#### 718 ***ctDNA tumor-normal admixtures and benchmarking***

719 Admixtures for evaluating benchmarking performance were constructed using 5 ARPC (LuCaP  
720 35, 35CR, 58, 92, 136CR) and 5 NEPC (LuCaP 49, 93, 145.2, 173.1, 208.4) lines mixed to 1%,  
721 5%, 10%, 20%, and 30% tumor fraction with a single healthy donor plasma line (NPH004,  
722 EGAD00001005343) at ~25X mean coverage, assuming 100% tumor fraction in post-mouse  
723 subtracted PDX sequencing data. After extracting chromosomal DNA with SAMtools v1.14 (96)  
724 and removing duplicates with Picard (<https://broadinstitute.github.io/picard/>), SAMtools was used  
725 to merge BAM files. Admixtures were then down-sampled to the number of reads corresponding  
726 to 1X and 0.2X using SAMtools to evaluate (ultra) low-pass WGS performance. During  
727 unsupervised benchmarking of each admixture the healthy and LuCaP line used in the admixture  
728 were excluded from the generation of feature distributions to ensure the model would not learn  
729 from the lines being interrogated. The admixture pipeline used in this study can be accessed at  
730 [https://github.com/GavinHaLab/Admixtures\\_snakemake](https://github.com/GavinHaLab/Admixtures_snakemake).

#### 731 ***Supervised binary classification of ARPC and NEPC***

732 Binary classification of ARPC and NEPC subtypes using individual region and feature  
733 combinations was conducted using XGBoost v1.4.2 ‘XGBClassifier’ implemented in Python with  
734 default parameters. Features included NPS and Mean Phased Nucleosome Distance (see  
735 Phasing analysis) in histone modification regions, promoters, and gene bodies; fragment size  
736 mean, short-long ratio, and coefficient of variation (see Fragment size analysis) in histone

737 modification regions, promoters, and gene bodies; central and window coverage (see Griffin  
738 analysis) in promoters, composite TFBSs, and composite differentially open chromatin regions  
739 identified through ATAC-Seq; and Max Wave Height (See Griffin analysis) in promoters. We  
740 applied stratified 6-fold cross-validation where two ARPC samples and one NEPC sample was  
741 held out in each fold. This was repeated 100 times and performance was computed using area  
742 under the receiver operating characteristic (ROC) curve (AUC) and 95% confidence intervals for  
743 each individual feature and region combination. Code and implementation of the method can be  
744 found at <https://github.com/GavinHaLab/CRPCSubtypingPaper/tree/main/SupervisedLearning>.

#### 745 ***Tumor fraction estimation***

746 Tumor fractions from patient plasma samples were assessed using ichorCNA (72) with binSize  
747 1,000,000 bp and hg19 reference genome. Default tumor fraction estimates reported by ichorCNA  
748 were used. See [https://github.com/GavinHaLab/CRPCSubtypingPaper/tree/main/ichorCNA\\_configuration](https://github.com/GavinHaLab/CRPCSubtypingPaper/tree/main/ichorCNA_configuration) for  
749 complete configuration settings.  
750

#### 751 ***Phenotype prediction model (ctdPheno)***

752 We developed a probabilistic model to classify the mCRPC phenotype (ARPC or NEPC) in an  
753 individual patient plasma ctDNA sample. This is a generative mixture model that is  
754 unsupervised—it does not train on the patient cohort of interest. However, the model accepts the  
755 pre-estimated tumor fraction from ichorCNA for the given patient ctDNA sample, as well as the  
756 pre-computed ctDNA features values from the LuCaP PDX ctDNA and healthy donor ctDNA as  
757 prior information. For each patient ctDNA sample, it fits the heterogeneous tumor fractions against  
758 the pure PDX LuCaP models. The expected feature value (mean  $m$  and standard deviation  $s$ )  
759 from each phenotype  $k$  for feature  $i$  were taken from the mean of LuCaP PDX samples ( $\mu_{i,k}$ ), or  
760 taken from the mean of a panel of normals  $H$  ( $\mu_{i,H}$ , male only,  $n = 14$ ; see Healthy Donor cohort)  
761 assuming a Gaussian distribution, is shifted such that the shifted values  $m'_{i,k}$ ,  $s'_{i,k}$  took the form:

$$762 \quad \mu'_{i,k} = \alpha\mu_{i,k} + (1 - \alpha)\mu_{i,H}$$
$$763 \quad \sigma'_{i,k} = \sqrt{\alpha\sigma_{i,k}^2 + (1 - \alpha)\sigma_{i,H}^2}$$

764 where  $a$  is the tumor fraction estimate for each test sample. In the final model, four features were  
765 used: composite open chromatin regions (central and window mean coverage) for specific  
766 phenotypes (ARPC and NEPC) identified from the LuCaP PDX ATAC-Seq analysis using Griffin  
767 (see Griffin analysis). For each feature  $i$ , we then found the probability that the observed sample

768 came from a mixture of the tumor-fraction-corrected Gaussian distributions, where  $\theta$  is the NEPC  
769 mixture weight:

$$770 \quad p_i(x|\theta) = \theta p(x|k = NEPC) + (1 - \theta)p(x | k = ARPC)$$

771 The  $\theta$  parameter is estimated by maximizing the joint log-likelihood  $L$  for a given patient sample:

$$772 \quad \theta' = \operatorname{argmax}_{\theta} [L(x|\theta)]$$

$$773 \quad \text{where } L(x|\theta) = \sum_i \ln [p_i(x|\theta)]$$

774  $\theta$  has range [0,1], where higher values indicate an increased proportion of the sample having a  
775 NEPC phenotype and was used as the NEPC prediction score metric. Code and implementation  
776 of the method can be found at  
777 <https://github.com/GavinHaLab/CRPCSubtypingPaper/tree/main/ctdPheno>.

### 778 ***Analysis and classification of clinical patient samples***

779 After establishing feature distributions using the LuCaP PDX lines and normal panel as described  
780 in Generative model, the model was applied to three clinical patient cohorts (see Human subjects  
781 for cohort information). Initial scoring using the model was run on DFCI cohort I, consisting of 101  
782 ULP-WGS samples with paired-end reads. Tumor fraction estimates predicted by ichorCNA and  
783 tumor phenotype classifications were obtained from the original study (25). A prediction score  
784 threshold of 0.3314 for calling NEPC was chosen because it offered an optimal performance for  
785 sensitivity (90%) and specificity (97.5%), where sensitivity is the true positive rate for identifying  
786 NEPC samples ( $\frac{TP}{TP+FN}$ ) and specificity is the true negative rate for identifying ARPC samples  
787 ( $\frac{TN}{TN+FP}$ ). Alternative thresholds maximizing sensitivity and specificity were 0.1077, at which 95%  
788 sensitivity was achieved with a lower specificity of 93.8%, and 0.3769 with a lower sensitivity of  
789 81.0% but higher specificity of 98.8%. To compare these predictions with cfDNA methylation  
790 (cfMeDIP-seq) classification on the same plasma samples in DFCI cohort I, the concordance was  
791 computed between the ctdPheno NEPC prediction score and the cfMeDIP NEPC score obtained  
792 from the original study using a 0.15 threshold (25).

793 We then validated the model on two cohorts, beginning with the already published DFCI cohort II  
794 (67,68,72). We restricted our analysis to eleven samples from six patients with matched ULP-  
795 WGS and WGS data with paired-end reads. Tumor fraction estimates from ichorCNA were  
796 obtained from the original study (72). All samples were considered adenocarcinoma (ARPC)

797 based on clinical histories (see Human subjects). The scoring threshold of 0.3314, determined  
798 from DFCI cohort I was used for phenotype classification.

799 For the *UW cohort*, consisting of 47 samples from 30 patients, ichorCNA was used to estimate  
800 sample tumor fractions as described above, while clinical phenotype was determined from clinical  
801 histories and expert chart review. We evaluated model performance on matched ULP-WGS and  
802 WGS data for unambiguous clinical phenotypes of ARPC and NEPC. The chosen scoring  
803 threshold of 0.3314 was used, and the fraction of correctly predicted ARPC (n=26) and NEPC  
804 (n=5) was computed. The remaining 16 samples with mixed histologies were not evaluated for  
805 performance.

## 806 **STATISTICAL ANALYSIS**

807 Quantification of and statistical approaches for high-throughput sequencing data analysis are  
808 described in the methods above. When non-parametric distributions (not normally distributed) of  
809 numerical values of a particular parameter in a population were compared (using boxplots or in  
810 tables), the two-tailed Mann-Whitney U test (also known as the Wilcoxon Rank Sum test;  
811 `scipy.stats.mannwhitneyu`, (95) was used to test if any two distributions being compared were  
812 significantly different, with Benjamini-Hochberg (`statsmodels.stats.multitest.fdr correction`,  
813 <https://www.statsmodels.org>) correction applied in multiple testing scenarios. All boxplots  
814 represent the median with a centerline, interquartile range (IQR) with a box, and first quartile –  
815 1.5 IQR and third quartile + 1.5 IQR with whiskers. PCA was conducted in Python  
816 (`sklearn.decomposition.PCA`; <https://scikit-learn.org>)

## 817 **DATA AVAILABILITY**

818 LuCaP patient derived xenograft (PDX) sequencing data generated in this study, including  
819 CUT&RUN results and processed cfDNA (cfDNA) sequencing data will be deposited at GEO and  
820 will be publicly available as of the date of publication. LuCaP PDX plasma cell-free DNA whole  
821 genome sequencing data will be deposited in dbGaP. The patient plasma genome sequencing  
822 data generated in this study will be deposited in a public repository and will be publicly available  
823 as of the date of publication. This paper also analyzes existing, publicly available data, including  
824 LuCaP PDX RNA-Seq (GSE199596) and ATAC-Seq data (SE156292). The DOIs and links to  
825 specific tools are available in the methods.

826 Any additional information required to reanalyze the data reported in this paper is available from  
827 the lead contact upon request.

## 828 REFERENCES

- 829 1. Karantanos T, Corn PG, Thompson TC. Prostate cancer progression after androgen  
830 deprivation therapy: mechanisms of castrate resistance and novel therapeutic approaches.  
831 *Oncogene*. Nature Publishing Group; 2013;32:5501–11.
- 832 2. Ryan CJ, Smith MR, de Bono JS, Molina A, Logothetis CJ, de Souza P, et al. Abiraterone  
833 in Metastatic Prostate Cancer without Previous Chemotherapy. *N Engl J Med*.  
834 Massachusetts Medical Society; 2013;368:138–48.
- 835 3. Scher HI, Fizazi K, Saad F, Taplin M-E, Sternberg CN, Miller K, et al. Increased Survival  
836 with Enzalutamide in Prostate Cancer after Chemotherapy. Cabot RC, Harris NL,  
837 Rosenberg ES, Shepard J-AO, Cort AM, Ebeling SH, et al., editors. *New England Journal*  
838 *of Medicine*. 2012;367:1187–97.
- 839 4. Beltran H, Prandi D, Mosquera JM, Benelli M, Puca L, Cyrta J, et al. Divergent clonal  
840 evolution of castration-resistant neuroendocrine prostate cancer. *Nature Medicine*. Nature  
841 Publishing Group; 2016;22:298–305.
- 842 5. Bluemn EG, Coleman IM, Lucas JM, Coleman RT, Hernandez-Lopez S, Tharakan R, et al.  
843 Androgen Receptor Pathway-Independent Prostate Cancer Is Sustained through FGF  
844 Signaling. *Cancer cell*. Elsevier; 2017;32:474-489.e6.
- 845 6. Conteduca V, Oromendia C, Eng KW, Bareja R, Sigouros M, Molina A, et al. Clinical  
846 features of neuroendocrine prostate cancer. *European Journal of Cancer*. 2019;121:7–18.
- 847 7. Aggarwal R, Huang J, Alumkal JJ, Zhang L, Feng FY, Thomas GV, et al. Clinical and  
848 Genomic Characterization of Treatment-Emergent Small-Cell Neuroendocrine Prostate  
849 Cancer: A Multi-institutional Prospective Study. *JCO*. American Society of Clinical  
850 Oncology; 2018;36:2492–503.
- 851 8. Baca SC, Takeda DY, Seo J-H, Hwang J, Ku SY, Arafeh R, et al. Reprogramming of the  
852 FOXA1 cisome in treatment-emergent neuroendocrine prostate cancer. *Nat Commun*.  
853 Nature Publishing Group; 2021;12:1979.
- 854 9. Cejas P, Xie Y, Font-Tello A, Lim K, Syamala S, Qiu X, et al. Subtype heterogeneity and  
855 epigenetic convergence in neuroendocrine prostate cancer. *Nat Commun*. 2021;12:5775.
- 856 10. Spetsieris N, Boukovala M, Patsakis G, Alafis I, Efstathiou E. Neuroendocrine and  
857 Aggressive-Variant Prostate Cancer. *Cancers*. Multidisciplinary Digital Publishing Institute;  
858 2020;12:3792.
- 859 11. Labrecque MP, Coleman IM, Brown LG, True LD, Kollath L, Lakely B, et al. Molecular  
860 profiling stratifies diverse phenotypes of treatment-refractory metastatic castration-resistant  
861 prostate cancer. *J Clin Invest*. American Society for Clinical Investigation; 2019;129:4492–  
862 505.
- 863 12. Labrecque MP, Alumkal JJ, Coleman IM, Nelson PS, Morrissey C. The heterogeneity of  
864 prostate cancers lacking AR activity will require diverse treatment approaches. *Endocrine-*  
865 *Related Cancer*. Bioscientifica Ltd; 2021;28:T51–66.

- 866 13. Liu Y, Horn JL, Banda K, Goodman AZ, Lim Y, Jana S, et al. The androgen receptor  
867 regulates a druggable translational regulon in advanced prostate cancer. *Science*  
868 *Translational Medicine*. American Association for the Advancement of Science;  
869 2019;11:eaaw4993.
- 870 14. Epstein JI, Amin MB, Beltran H, Lotan TL, Mosquera J-M, Reuter VE, et al. Proposed  
871 Morphologic Classification of Prostate Cancer With Neuroendocrine Differentiation. *The*  
872 *American Journal of Surgical Pathology*. 2014;38:756–67.
- 873 15. Annala M, Taavitsainen S, Khalaf DJ, Vandekerkhove G, Beja K, Sipola J, et al. Evolution  
874 of Castration-Resistant Prostate Cancer in ctDNA during Sequential Androgen Receptor  
875 Pathway Inhibition. *Clinical Cancer Research*. 2021;27:4610–23.
- 876 16. Aparicio AM, Shen L, Tapia ELN, Lu J-F, Chen H-C, Zhang J, et al. Combined Tumor  
877 Suppressor Defects Characterize Clinically Defined Aggressive Variant Prostate Cancers.  
878 *Clinical Cancer Research*. 2016;22:1520–30.
- 879 17. Carreira S, Romanel A, Goodall J, Grist E, Ferraldeschi R, Miranda S, et al. Tumor clone  
880 dynamics in lethal prostate cancer. *Science translational medicine*. 2014;6:254ra125.
- 881 18. Du M, Tian Y, Tan W, Wang L, Wang L, Kilari D, et al. Plasma cell-free DNA-based  
882 predictors of response to abiraterone acetate/prednisone and prognostic factors in  
883 metastatic castration-resistant prostate cancer. *Prostate Cancer Prostatic Dis*. Nature  
884 Publishing Group; 2020;23:705–13.
- 885 19. Sumanasuriya S, Seed G, Parr H, Christova R, Pope L, Bertan C, et al. Elucidating  
886 Prostate Cancer Behaviour During Treatment via Low-pass Whole-genome Sequencing of  
887 Circulating Tumour DNA. *European Urology*. 2021;80:243–53.
- 888 20. Ulz P, Belic J, Graf R, Auer M, Lafer I, Fischereeder K, et al. Whole-genome plasma  
889 sequencing reveals focal amplifications as a driving force in metastatic prostate cancer.  
890 *Nat Commun*. Institute of Human Genetics, Medical University of Graz, A-8010 Graz,  
891 Austria. Department of Urology, Medical University of Graz, A-8036 Graz, Austria.  
892 Department of Internal Medicine I, Hospital Barmherzige Schwestern Linz, A-4020 Linz,  
893 Austria. *Departmente*; 2016;7:12008.
- 894 21. Wyatt AW, Annala M, Aggarwal R, Beja K, Feng F, Youngren J, et al. Concordance of  
895 Circulating Tumor DNA and Matched Metastatic Tissue Biopsy in Prostate Cancer. *JNCI:*  
896 *Journal of the National Cancer Institute*. Oxford University Press; 2018;110:78–86.
- 897 22. Nyquist MD, Corella A, Coleman I, De Sarkar N, Kaipainen A, Ha G, et al. Combined TP53  
898 and RB1 Loss Promotes Prostate Cancer Resistance to a Spectrum of Therapeutics and  
899 Confers Vulnerability to Replication Stress. *Cell Reports*. 2020;31:107669.
- 900 23. Berger A, Brady NJ, Bareja R, Robinson B, Conteduca V, Augello MA, et al. N-Myc–  
901 mediated epigenetic reprogramming drives lineage plasticity in advanced prostate cancer.  
902 *J Clin Invest*. American Society for Clinical Investigation; 2019;129:3924–40.
- 903 24. Beltran H, Romanel A, Conteduca V, Casiraghi N, Sigouros M, Franceschini GM, et al.  
904 Circulating tumor DNA profile recognizes transformation to castration-resistant

- 905 neuroendocrine prostate cancer. *J Clin Invest*. American Society for Clinical Investigation;  
906 2020;130:1653–68.
- 907 25. Berchuck JE, Baca SC, McClure HM, Korthauer K, Tsai HK, Nuzzo PV, et al. Detecting  
908 Neuroendocrine Prostate Cancer Through Tissue-Informed Cell-Free DNA Methylation  
909 Analysis. *Clinical Cancer Research*. 2022;28:928–38.
- 910 26. Shen SY, Singhania R, Fehringer G, Chakravarthy A, Roehrl MHA, Chadwick D, et al.  
911 Sensitive tumour detection and classification using plasma cell-free DNA methylomes.  
912 *Nature*. Nature Publishing Group; 2018;563:579–83.
- 913 27. Wu A, Cremaschi P, Wetterskog D, Conteduca V, Franceschini GM, Kleftogiannis D, et al.  
914 Genome-wide plasma DNA methylation features of metastatic prostate cancer. *J Clin  
915 Invest*. American Society for Clinical Investigation; 2020;130:1991–2000.
- 916 28. Heitzer E, Aunger L, Speicher MR. Cell-Free DNA and Apoptosis: How Dead Cells Inform  
917 About the Living. *Trends in Molecular Medicine*. Elsevier Ltd; 2020;26:519–28.
- 918 29. Lo YMD, Han DSC, Jiang P, Chiu RWK. Epigenetics, fragmentomics, and topology of cell-  
919 free DNA in liquid biopsies. *Science* [Internet]. American Association for the Advancement  
920 of Science; 2021 [cited 2021 Apr 12];372. Available from:  
921 <https://science.sciencemag.org/content/372/6538/eaaw3616>
- 922 30. Cristiano S, Leal A, Phallen J, Fiksel J, Adleff V, Bruhm DC, et al. Genome-wide cell-free  
923 DNA fragmentation in patients with cancer. *Nature*. Nature Publishing Group;  
924 2019;570:385–9.
- 925 31. Jiang P, Sun K, Peng W, Cheng SH, Ni M, Yeung PC, et al. Plasma DNA End-Motif  
926 Profiling as a Fragmentomic Marker in Cancer, Pregnancy, and Transplantation. *Cancer  
927 Discov*. American Association for Cancer Research; 2020;10:664–73.
- 928 32. Mathios D, Johansen JS, Cristiano S, Medina JE, Phallen J, Larsen KR, et al. Detection  
929 and characterization of lung cancer using cell-free DNA fragmentomes. *Nat Commun*.  
930 2021;12:5060.
- 931 33. Peneder P, Stütz AM, Surdez D, Krumbholz M, Semper S, Chicard M, et al. Multimodal  
932 analysis of cell-free DNA whole-genome sequencing for pediatric cancers with low  
933 mutational burden. *Nat Commun*. Nature Publishing Group; 2021;12:3230.
- 934 34. Zhu G, Guo YA, Ho D, Poon P, Poh ZW, Wong PM, et al. Tissue-specific cell-free DNA  
935 degradation quantifies circulating tumor DNA burden. *Nature Communications*. Nature  
936 Publishing Group; 2021;12:2229.
- 937 35. Jiang P, Chan CWM, Chan KCA, Cheng SH, Wong J, Wong VW-S, et al. Lengthening and  
938 shortening of plasma DNA in hepatocellular carcinoma patients. *Proceedings of the  
939 National Academy of Sciences of the United States of America*. 2015;112:E1317-25.
- 940 36. Mouliere F, Chandrananda D, Piskorz AM, Moore EK, Morris J, Ahlborn LB, et al.  
941 Enhanced detection of circulating tumor DNA by fragment size analysis. *Science  
942 Translational Medicine*. 2018;10:eaat4921.



- 943 37. Snyder MW, Kircher M, Hill AJ, Daza RM, Shendure J. Cell-free DNA Comprises an in  
944 Vivo Nucleosome Footprint that Informs Its Tissues-Of-Origin. *Cell*. Elsevier Inc.;  
945 2016;164:57–68.
- 946 38. Underhill HR, Kitzman JO, Hellwig S, Welker NC, Daza R, Baker DN, et al. Fragment  
947 Length of Circulating Tumor DNA. *PLOS Genet*. 2016;12:426–37.
- 948 39. Ramachandran S, Ahmad K, Henikoff S. Transcription and Remodeling Produce  
949 Asymmetrically Unwrapped Nucleosomal Intermediates. *Molecular Cell*. Cell Press;  
950 2017;68:1038-1053.e4.
- 951 40. Ulz P, Thallinger GG, Auer M, Graf R, Kashofer K, Jahn SW, et al. Inferring expressed  
952 genes by whole-genome sequencing of plasma DNA. *Nature Genetics*. Nature Publishing  
953 Group; 2016;48:1273–8.
- 954 41. Ulz P, Perakis S, Zhou Q, Moser T, Belic J, Lazzeri I, et al. Inference of transcription factor  
955 binding from cell-free DNA enables tumor subtype prediction and early detection. *Nature*  
956 *Communications*. 2019;10:4666.
- 957 42. Brahma S, Henikoff S. Epigenome Regulation by Dynamic Nucleosome Unwrapping.  
958 *Trends in Biochemical Sciences*. Elsevier; 2020;45:13–26.
- 959 43. Lai WKM, Pugh BF. Understanding nucleosome dynamics and their links to gene  
960 expression and DNA replication. *Nat Rev Mol Cell Biol*. 2017;18:548–62.
- 961 44. Yen K, Vinayachandran V, Batta K, Koerber RT, Pugh BF. Genome-wide Nucleosome  
962 Specificity and Directionality of Chromatin Remodelers. *Cell*. 2012;149:1461–73.
- 963 45. Nguyen HM, Vessella RL, Morrissey C, Brown LG, Coleman IM, Higano CS, et al. LuCaP  
964 Prostate Cancer Patient-Derived Xenografts Reflect the Molecular Heterogeneity of  
965 Advanced Disease and Serve as Models for Evaluating Cancer Therapeutics. *The*  
966 *Prostate*. John Wiley & Sons, Ltd; 2017;77:654–71.
- 967 46. Skene PJ, Henikoff S. An efficient targeted nuclease strategy for high-resolution mapping  
968 of DNA binding sites. Reinberg D, editor. *eLife*. eLife Sciences Publications, Ltd;  
969 2017;6:e21856.
- 970 47. Meers MP, Tenenbaum D, Henikoff S. Peak calling by Sparse Enrichment Analysis for  
971 CUT&RUN chromatin profiling. *Epigenetics & Chromatin*. 2019;12:42.
- 972 48. Zhou VW, Goren A, Bernstein BE. Charting histone modifications and the functional  
973 organization of mammalian genomes. *Nat Rev Genet*. 2011;12:7–18.
- 974 49. Doebley A-L, Ko M, Liao H, Cruikshank AE, Kikawa C, Santos K, et al. Griffin: Framework  
975 for clinical cancer subtyping from nucleosome profiling of cell-free DNA. *medRxiv*.  
976 2021;2021.08.31.21262867.
- 977 50. Soares LM, He PC, Chun Y, Suh H, Kim T, Buratowski S. Determinants of Histone H3K4  
978 Methylation Patterns. *Molecular Cell*. 2017;68:773-785.e6.

- 979 51. Brady NJ, Bagadion AM, Singh R, Conteduca V, Van Emmenis L, Arceci E, et al. Temporal  
980 evolution of cellular heterogeneity during the progression to advanced AR-negative  
981 prostate cancer. *Nat Commun.* Nature Publishing Group; 2021;12:3372.
- 982 52. Wang YA, Sfakianos J, Tewari AK, Cordon-cardo C, Kyprianou N. Molecular tracing of  
983 prostate cancer lethality. *Oncogene.* Nature Publishing Group; 2020;39:7225–38.
- 984 53. Rapa I, Ceppi P, Bollito E, Rosas R, Cappia S, Bacillo E, et al. Human ASH1 expression in  
985 prostate cancer with neuroendocrine differentiation. *Mod Pathol.* Nature Publishing Group;  
986 2008;21:700–7.
- 987 54. Labrecque MP, Brown LG, Coleman IM, Lakely B, Brady NJ, Lee JK, et al. RNA Splicing  
988 Factors SRRM3 and SRRM4 Distinguish Molecular Phenotypes of Castration-Resistant  
989 Neuroendocrine Prostate Cancer. *Cancer Research.* 2021;81:4736–50.
- 990 55. Jiang Z, Zhang B. On the role of transcription in positioning nucleosomes. *PLOS*  
991 *Computational Biology.* Public Library of Science; 2021;17:e1008556.
- 992 56. Klemm SL, Shipony Z, Greenleaf WJ. Chromatin accessibility and the regulatory  
993 epigenome. *Nature Reviews Genetics.* Nature Publishing Group; 2019;20:207–20.
- 994 57. Oruba A, Sacconi S, van Essen D. Role of cell-type specific nucleosome positioning in  
995 inducible activation of mammalian promoters. *Nat Commun.* 2020;11:1075.
- 996 58. Guo Y, Zhao S, Wang GG. Polycomb Gene Silencing Mechanisms: PRC2 Chromatin  
997 Targeting, H3K27me3 “Readout”, and Phase Separation-Based Compaction. *Trends in*  
998 *Genetics.* Elsevier; 2021;37:547–65.
- 999 59. Jiang C, Pugh BF. Nucleosome positioning and gene regulation: advances through  
1000 genomics. *Nat Rev Genet.* 2009;10:161–72.
- 1001 60. Saxton DS, Rine J. Nucleosome Positioning Regulates the Establishment, Stability, and  
1002 Inheritance of Heterochromatin in *Saccharomyces cerevisiae*. *Proceedings of the National*  
1003 *Academy of Sciences.* *Proceedings of the National Academy of Sciences*;  
1004 2020;117:27493–501.
- 1005 61. Valouev A, Johnson SM, Boyd SD, Smith CL, Fire AZ, Sidow A. Determinants of  
1006 nucleosome organization in primary human cells. *Nature.* Nature Publishing Group;  
1007 2011;474:516–20.
- 1008 62. Cuzick J, Swanson GP, Fisher G, Brothman AR, Berney DM, Reid JE, et al. Prognostic  
1009 value of an RNA expression signature derived from cell cycle proliferation genes in  
1010 patients with prostate cancer: a retrospective study. *The Lancet Oncology.* 2011;12:245–  
1011 55.
- 1012 63. Arora VK, Schenkein E, Murali R, Subudhi SK, Wongvipat J, Balbas MD, et al.  
1013 Glucocorticoid Receptor Confers Resistance to Antiandrogens by Bypassing Androgen  
1014 Receptor Blockade. *Cell.* Elsevier; 2013;155:1309–22.

- 1015 64. Mu P, Zhang Z, Benelli M, Karthaus WR, Hoover E, Chen C-C, et al. SOX2 promotes  
1016 lineage plasticity and antiandrogen resistance in TP53- and RB1-deficient prostate cancer.  
1017 Science. American Association for the Advancement of Science; 2017;355:84–8.
- 1018 65. Shukla S, Cyrtta J, Murphy DA, Walczak EG, Ran L, Agrawal P, et al. Aberrant Activation of  
1019 a Gastrointestinal Transcriptional Circuit in Prostate Cancer Mediates Castration  
1020 Resistance. Cancer Cell. Elsevier; 2017;32:792-806.e7.
- 1021 66. Sun K, Jiang P, Cheng SH, Cheng THT, Wong J, Wong VWS, et al. Orientation-aware  
1022 plasma cell-free DNA fragmentation analysis in open chromatin regions informs tissue of  
1023 origin. Genome research. Cold Spring Harbor Laboratory Press; 2019;29:418–27.
- 1024 67. Viswanathan SR, Ha G, Hoff AM, Wala JA, Carrot-Zhang J, Whelan CW, et al. Structural  
1025 Alterations Driving Castration-Resistant Prostate Cancer Revealed by Linked-Read  
1026 Genome Sequencing. Cell. Elsevier; 2018;174:433-447.e19.
- 1027 68. Choudhury AD, Werner L, Francini E, Wei XX, Ha G, Freeman SS, et al. Tumor fraction in  
1028 cell-free DNA as a biomarker in prostate cancer. JCI Insight [Internet]. American Society  
1029 for Clinical Investigation; 2018 [cited 2019 Mar 1];3. Available from:  
1030 <https://insight.jci.org/articles/view/122109>
- 1031 69. Klein DC, Hainer SJ. Genomic methods in profiling DNA accessibility and factor  
1032 localization. Chromosome Res. 2020;28:69–85.
- 1033 70. Chaytor L, Simcock M, Nakjang S, Heath R, Walker L, Robson C, et al. The Pioneering  
1034 Role of GATA2 in Androgen Receptor Variant Regulation Is Controlled by Bromodomain  
1035 and Extraterminal Proteins in Castrate-Resistant Prostate Cancer. Mol Cancer Res.  
1036 American Association for Cancer Research; 2019;17:1264–78.
- 1037 71. Corces MR, Granja JM, Shams S, Louie BH, Seoane JA, Zhou W, et al. The chromatin  
1038 accessibility landscape of primary human cancers. Science. 2018;362.
- 1039 72. Adalsteinsson VA, Ha G, Freeman SS, Choudhury AD, Stover DG, Parsons HA, et al.  
1040 Scalable whole-exome sequencing of cell-free DNA reveals high concordance with  
1041 metastatic tumors. Nature Communications. 2017;8.
- 1042 73. Fang R, Preissl S, Li Y, Hou X, Lucero J, Wang X, et al. Comprehensive analysis of single  
1043 cell ATAC-seq data with SnapATAC. Nat Commun. Nature Publishing Group;  
1044 2021;12:1337.
- 1045 74. Wu SJ, Furlan SN, Mihalas AB, Kaya-Okur HS, Feroze AH, Emerson SN, et al. Single-cell  
1046 CUT&Tag analysis of chromatin modifications in differentiation and tumor progression. Nat  
1047 Biotechnol. 2021;39:819–24.
- 1048 75. Lam H-M, Nguyen HM, Corey E. Generation of Prostate Cancer Patient-Derived  
1049 Xenografts to Investigate Mechanisms of Novel Treatments and Treatment Resistance. In:  
1050 Culig Z, editor. Prostate Cancer: Methods and Protocols [Internet]. New York, NY:  
1051 Springer; 2018 [cited 2022 Mar 22]. page 1–27. Available from:  
1052 [https://doi.org/10.1007/978-1-4939-7845-8\\_1](https://doi.org/10.1007/978-1-4939-7845-8_1)

- 1053 76. Li H. Aligning sequence reads, clone sequences and assembly contigs with BWA-MEM.  
1054 arXiv:13033997 [q-bio] [Internet]. 2013 [cited 2022 Mar 22]; Available from:  
1055 <http://arxiv.org/abs/1303.3997>
- 1056 77. Jo S-Y, Kim E, Kim S. Impact of mouse contamination in genomic profiling of patient-  
1057 derived models and best practice for robust analysis. *Genome Biology*. 2019;20:231.
- 1058 78. DePristo MA, Banks E, Poplin R, Garimella KV, Maguire JR, Hartl C, et al. A framework for  
1059 variation discovery and genotyping using next-generation DNA sequencing data. *Nat*  
1060 *Genet*. Nature Publishing Group; 2011;43:491–8.
- 1061 79. Hänzelmann S, Castelo R, Guinney J. GSVA: gene set variation analysis for microarray  
1062 and RNA-Seq data. *BMC Bioinformatics*. 2013;14:7.
- 1063 80. Dobin A, Davis CA, Schlesinger F, Drenkow J, Zaleski C, Jha S, et al. STAR: ultrafast  
1064 universal RNA-seq aligner. *Bioinformatics*. 2013;29:15–21.
- 1065 81. Kluin RJC, Kemper K, Kuilman T, de Ruyter JR, Iyer V, Forment JV, et al. XenofilteR:  
1066 computational deconvolution of mouse and human reads in tumor xenograft sequence  
1067 data. *BMC Bioinformatics*. 2018;19:366.
- 1068 82. Robinson MD, McCarthy DJ, Smyth GK. edgeR: a Bioconductor package for differential  
1069 expression analysis of digital gene expression data. *Bioinformatics*. 2010;26:139–40.
- 1070 83. Lambert SA, Jolma A, Campitelli LF, Das PK, Yin Y, Albu M, et al. The Human  
1071 Transcription Factors. *Cell*. 2018;172:650–65.
- 1072 84. Langmead B, Wilks C, Antonescu V, Charles R. Scaling read aligners to hundreds of  
1073 threads on general-purpose processors. *Bioinformatics*. 2019;35:421–32.
- 1074 85. Ramírez F, Ryan DP, Grüning B, Bhardwaj V, Kilpert F, Richter AS, et al. deepTools2: a  
1075 next generation web server for deep-sequencing data analysis. *Nucleic Acids Research*.  
1076 2016;44:W160–5.
- 1077 86. Richard G. gtrichard/deepStats [Internet]. Zenodo; 2020 [cited 2022 Mar 22]. Available  
1078 from: <https://zenodo.org/record/3668336>
- 1079 87. Ross-Innes CS, Stark R, Teschendorff AE, Holmes KA, Ali HR, Dunning MJ, et al.  
1080 Differential oestrogen receptor binding is associated with clinical outcome in breast cancer.  
1081 *Nature*. 2012;481:389–93.
- 1082 88. Quinlan AR, Hall IM. BEDTools: a flexible suite of utilities for comparing genomic features.  
1083 *Bioinformatics*. 2010;26:841–2.
- 1084 89. Yu G, Wang L-G, He Q-Y. ChIPseeker: an R/Bioconductor package for ChIP peak  
1085 annotation, comparison and visualization. *Bioinformatics*. 2015;31:2382–3.
- 1086 90. Amemiya HM, Kundaje A, Boyle AP. The ENCODE Blacklist: Identification of Problematic  
1087 Regions of the Genome. *Sci Rep*. Nature Publishing Group; 2019;9:9354.

- 1088 91. Khan A, Mathelier A. Intervene: a tool for intersection and visualization of multiple gene or  
1089 genomic region sets. *BMC Bioinformatics*. 2017;18:287.
- 1090 92. Karimzadeh M, Ernst C, Kundaje A, Hoffman MM. Umap and Bismap: quantifying genome  
1091 and methylome mappability. *Nucleic Acids Research*. 2018;46:e120.
- 1092 93. Benjamini Y, Speed TP. Summarizing and correcting the GC content bias in high-  
1093 throughput sequencing. *Nucleic Acids Research*. 2012;40:e72–e72.
- 1094 94. Howe KL, Achuthan P, Allen J, Allen J, Alvarez-Jarreta J, Amode MR, et al. Ensembl 2021.  
1095 *Nucleic Acids Research*. 2021;49:D884–91.
- 1096 95. Virtanen P, Gommers R, Oliphant TE, Haberland M, Reddy T, Cournapeau D, et al. SciPy  
1097 1.0: fundamental algorithms for scientific computing in Python. *Nat Methods*. Nature  
1098 Publishing Group; 2020;17:261–72.
- 1099 96. Danecek P, Bonfield JK, Liddle J, Marshall J, Ohan V, Pollard MO, et al. Twelve years of  
1100 SAMtools and BCFtools. *GigaScience*. 2021;10:giab008.
- 1101 97. Yevshin I, Sharipov R, Kolmykov S, Kondrakhin Y, Kolpakov F. GTRD: a database on  
1102 gene transcription regulation—2019 update. *Nucleic Acids Res*. Oxford Academic;  
1103 2019;47:D100–5.

1104

1105

A

bioRxiv preprint doi: <https://doi.org/10.1101/2022.06.21.496879>; this version posted June 25, 2022. The copyright holder for this preprint (which was not certified by peer review) is the author/funder, who has granted bioRxiv a license to display the preprint in perpetuity. It is made available under aCC-BY-NC-ND 4.0 International license.

## PDX Plasma and Tumor Sequencing

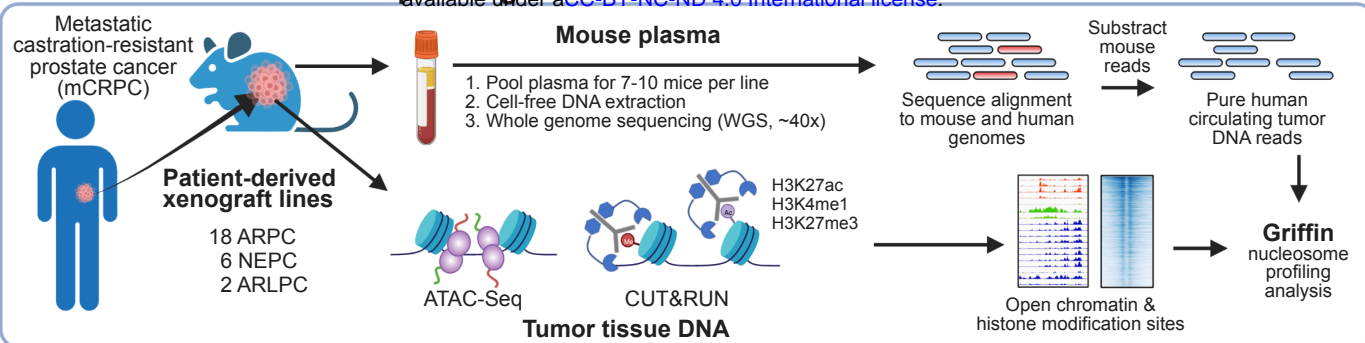

## Circulating Tumor DNA Feature Discovery

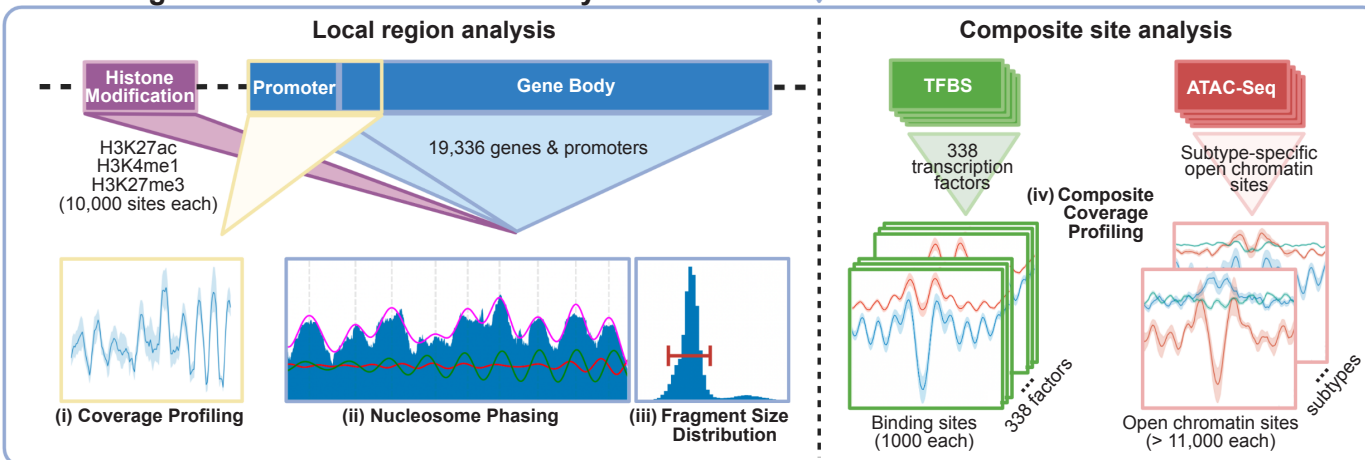

## Circulating Tumor DNA Characterization

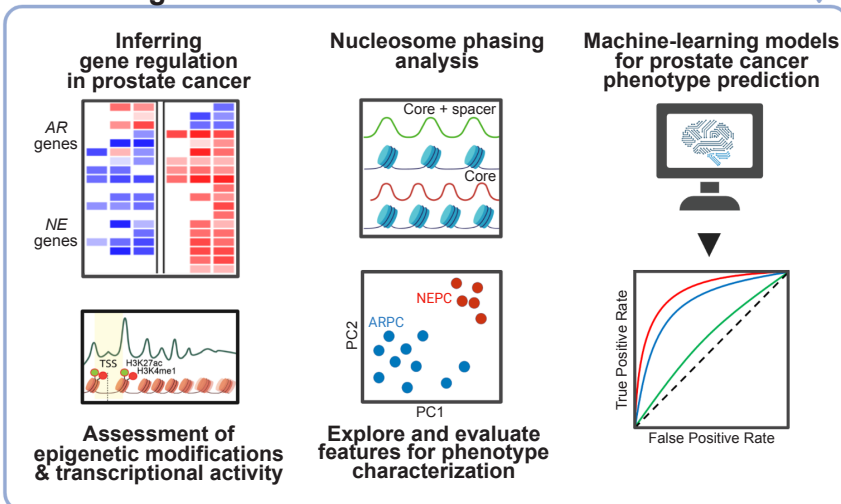

## Patient Phenotyping

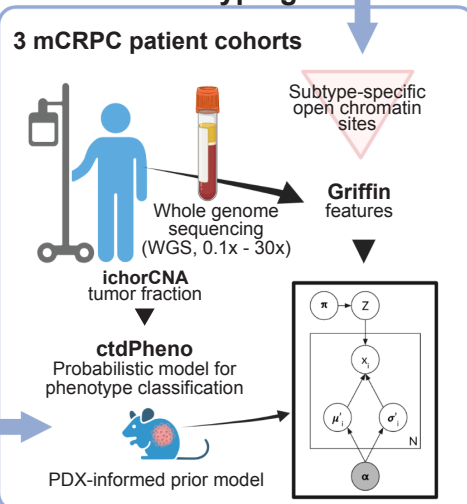

B

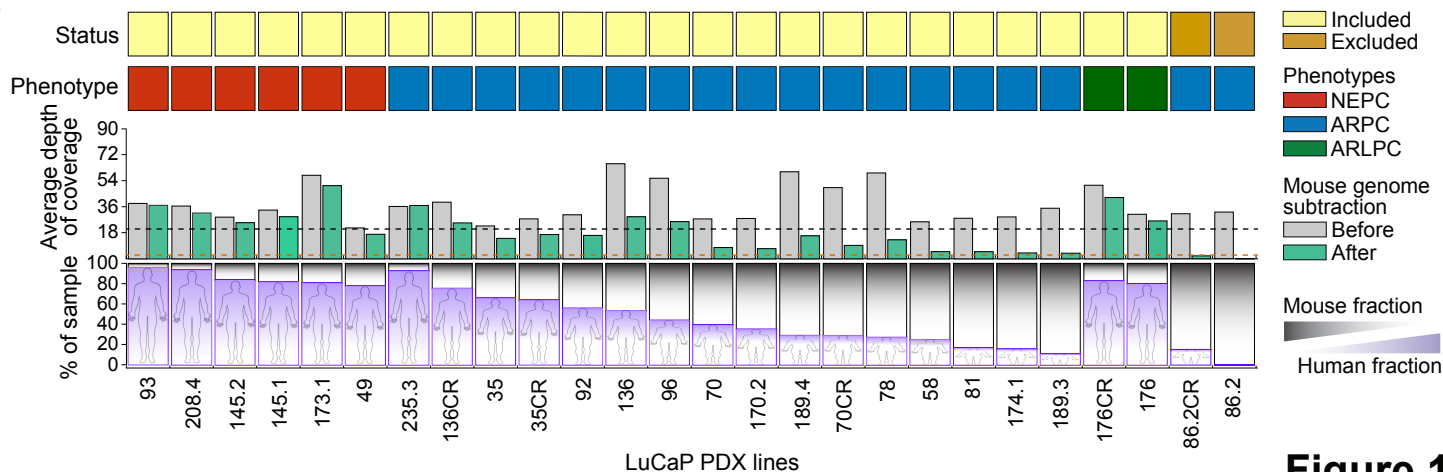

Figure 1

1106 **Figure 1. Characterizing advanced prostate cancer through matched tumor and liquid**  
1107 **biopsies from PDX models**

1108 **(A) (top)** Both blood and tissue samples were taken from 26 patient-derived xenograft (PDX)  
1109 mouse models with tumors originating from metastatic castration-resistant prostate cancer  
1110 (mCRPC) with AR-positive adenocarcinoma (ARPC), neuroendocrine (NEPC), AR-low  
1111 neuroendocrine-negative (ARLPC) phenotypes. Cell-free DNA (cfDNA) was extracted  
1112 from pooled plasma collected from 7-10 mice and whole genome sequencing (WGS) was  
1113 performed. Following bioinformatic mouse read subtraction, pure human circulating tumor  
1114 DNA (ctDNA) reads remained. From PDX tissue, ATAC-Seq and CUT&RUN (targeting  
1115 H3K27ac, H3K4me1, and H3K27me3) data were generated. **(middle)** Four distinct ctDNA  
1116 features were analyzed at five genomic region types using Griffin (49) and nucleosome  
1117 phasing methods developed in this study **(Methods)**. **(bottom, left)** Overview of PDX  
1118 ctDNA features profiled to characterize the mCRPC pathways, transcriptional regulation,  
1119 and nucleosome positioning. ctDNA features were evaluated for phenotype classification.  
1120 **(bottom, right)** Phenotype classification using a probabilistic model that accounted for  
1121 ctDNA tumor content and informed by PDX features was applied to 159 samples in three  
1122 patient cohorts.

1123 **(B)** PDX phenotypes and mouse plasma sequencing. Inclusion status based on final mean  
1124 depth after mouse read subtraction (< 3x coverage were excluded; red dotted line).  
1125 Phenotype status, including 6 NEPC, 18 ARPC (2 excluded), and 2 ARLPC. Average  
1126 depth of coverage before and after mouse subtraction (mean coverage 20.5x; dotted line).  
1127 Percentage of the cfDNA sample that contains human ctDNA after mouse read subtraction.  
1128

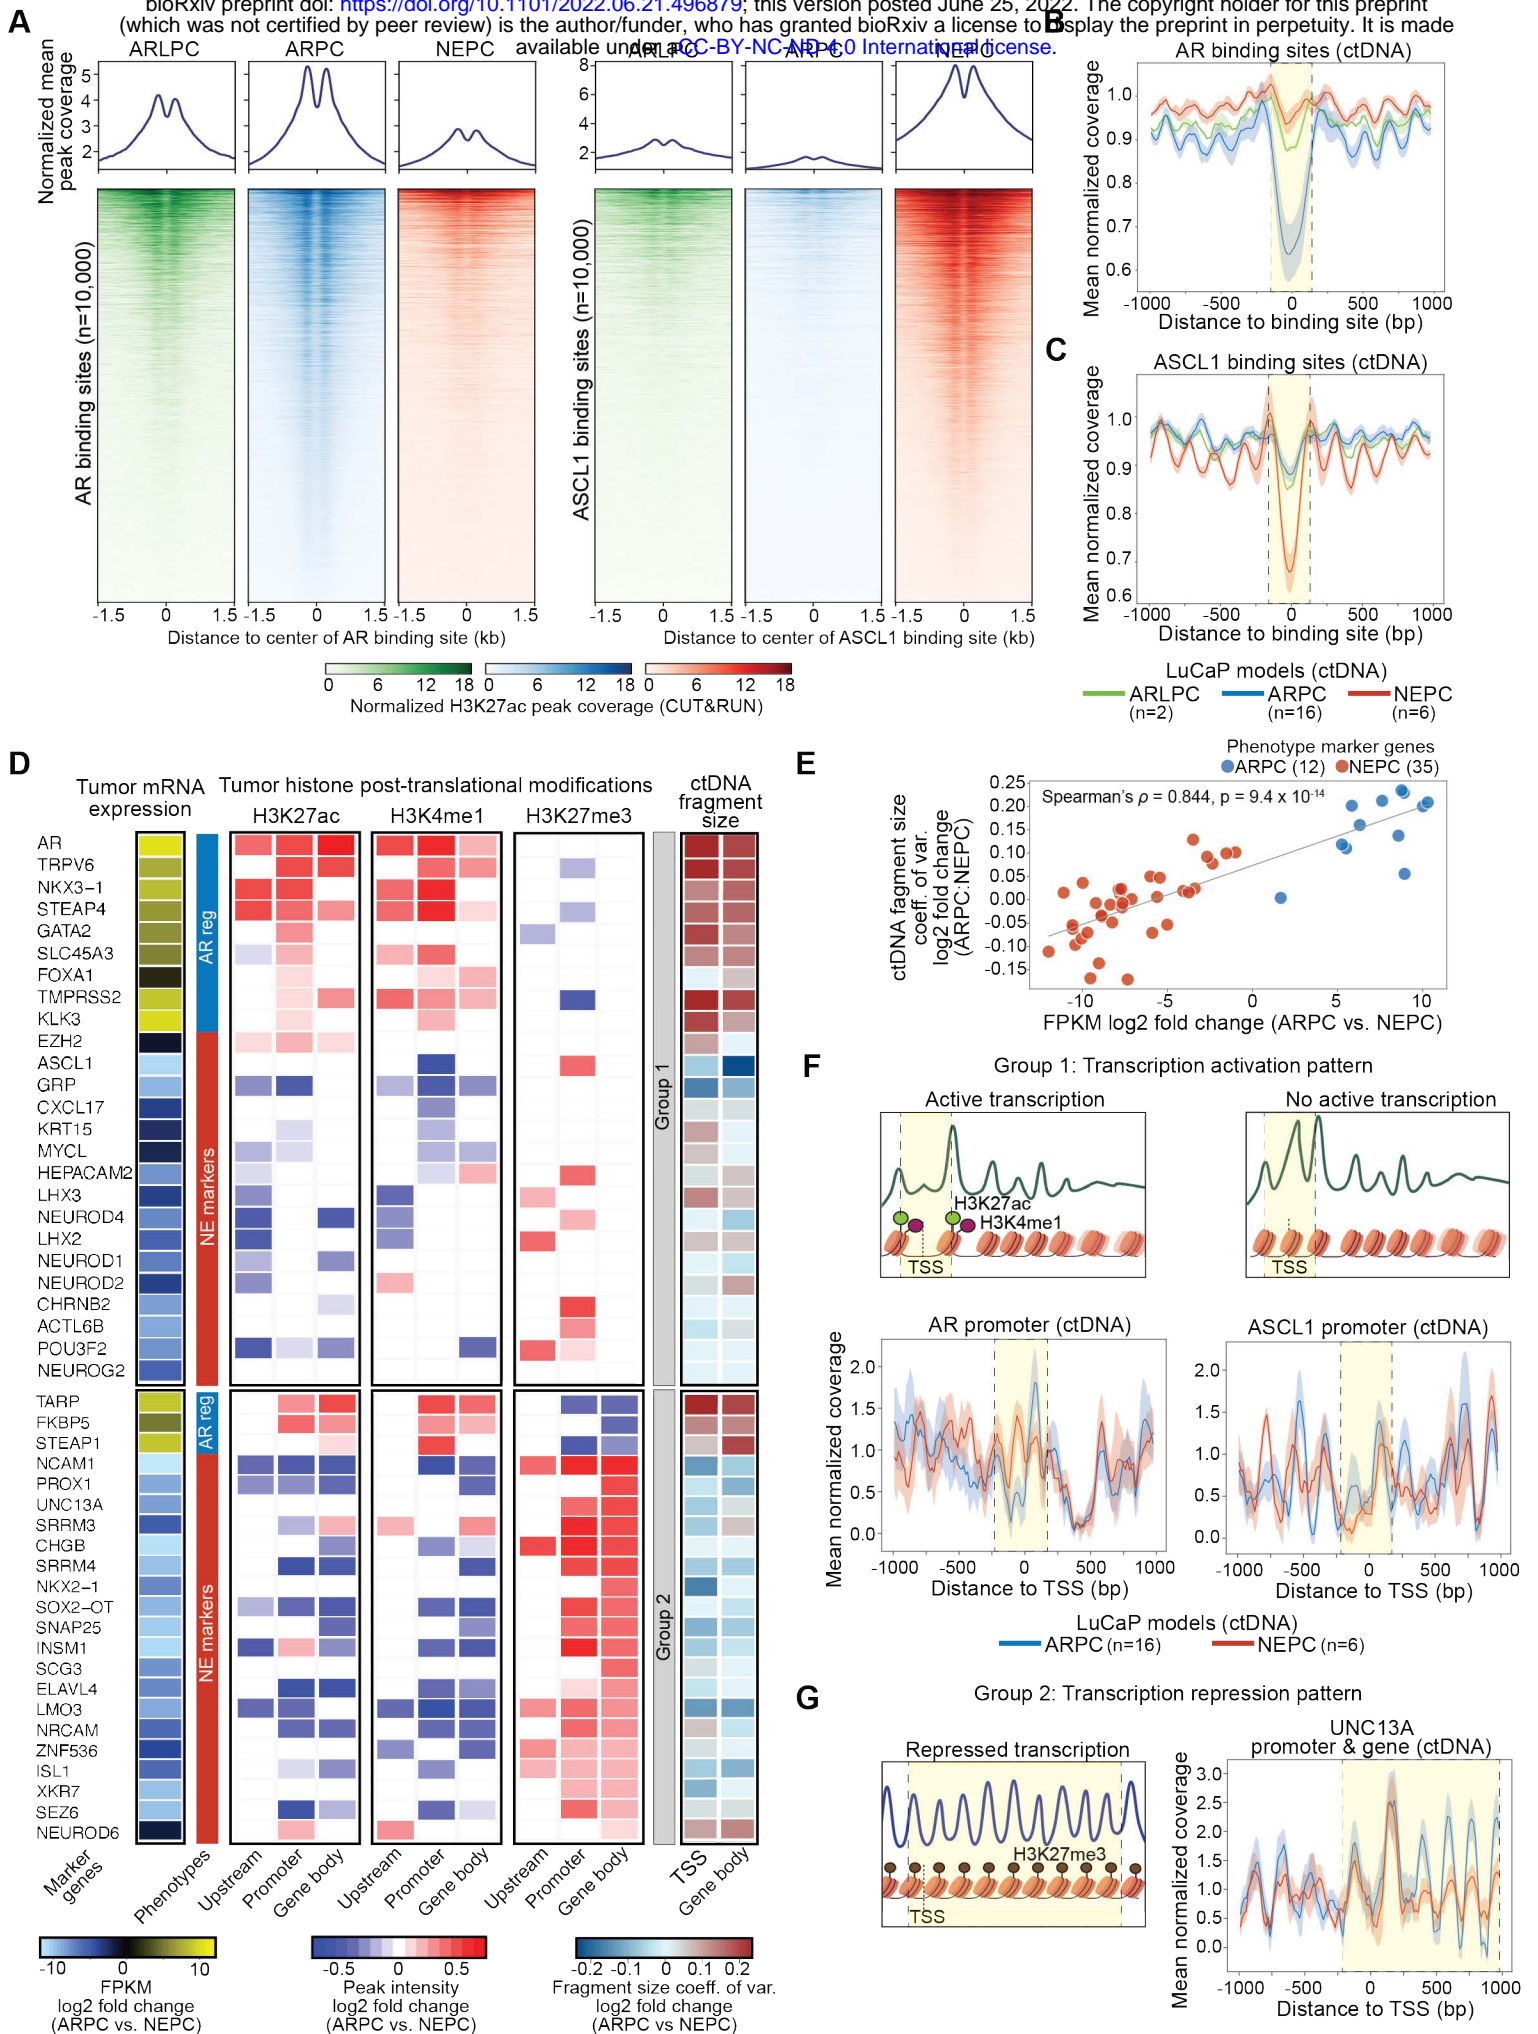

**Figure 2**



1129 **Figure 2. Analysis of tumor histone modifications and ctDNA reveals nucleosome patterns**  
1130 **consistent with transcriptional regulation in CRPC phenotype-specific genes**

1131 **(A)** H3K27ac peak signals between ARLPC, ARPC, and NEPC PDX tumor phenotypes at  
1132 10,000 AR binding sites (left) and at ASCL1 binding sites (right). Binding sites were  
1133 selected from the GTRD (97) (**Methods**).

1134 **(B-C)** Composite coverage profiles at 1000 AR (**B**) and ASCL1 (**C**) binding sites in ctDNA  
1135 analyzed using Griffin. Coverage profile means (lines) and 95% confidence interval with  
1136 1000 bootstraps (shading) are shown. The region  $\pm 150$  bp is indicated with vertical dotted  
1137 line and yellow shading.

1138 **(D)** Heatmap of  $\log_2$  fold change in key genes up and down regulated between ARPC and  
1139 NEPC established through RNA-Seq (**left**) grouped by the type of histone modification  
1140 which dictates translation levels: Group 1 shows genes where the predominate PTM mark  
1141 is attributed to H3K27ac or H3K4me1 active marks in the gene promoters or putative distal  
1142 enhancers, lacking H3K27me3 heterochromatic mark in the gene body; Group 2 features  
1143 gene body spanning H3K27me3 repression marks. Central columns show differential peak  
1144 intensity for each of the assayed histone modifications, separated by whether they appear  
1145 upstream or in the promoter or the body of each gene. On the right the  $\log_2$  fold change  
1146 between ARPC and NEPC lines' fragment size coefficient of variation (CV) is shown for  
1147 TSS+/-1 KB windows and respective gene bodies.

1148 **(E)** Comparison of the  $\log_2$  fold change (ARPC/NEPC) of mean mRNA expression vs mean  
1149 coefficient of variation (CV) in the 47 phenotypic lineage marker genes' promoter regions.

1150 **(F) (top)** Illustrations of expected ctDNA coverage profiles for Group 1 genes with and without  
1151 H3K27ac or H3K4me1 modification leading to active and inactive transcription,  
1152 respectively. **(bottom)**  $\pm 1000$  bp surrounding the promoter region for AR and ASCL1 in  
1153 ARPC and NEPC. Shown are coverage profile means (lines) and 95% confidence interval  
1154 with 1000 bootstraps (shading). Decreased coverage is reflective of increased  
1155 nucleosome accessibility and thus increased transcription. Dotted line and yellow shading  
1156 highlight the transcription start site (TSS) at -230 bp and +170 bp.

1157 **(G)** Illustration of expected ctDNA coverage profiles for Group 2 genes with repressed  
1158 transcription caused by H3K27me3 modifications in the gene body. Neuronal gene  
1159 UNC13A has increased nucleosome phasing in ctDNA of ARPC samples compared to  
1160 NEPC.

**A**

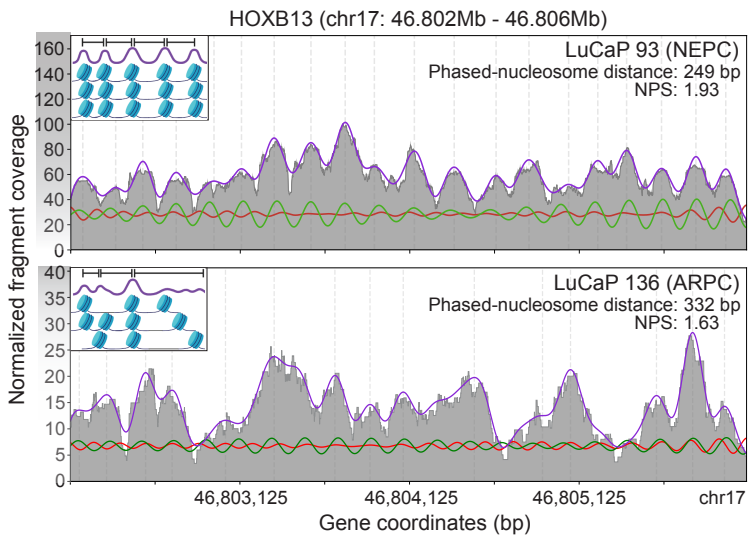

Fragment coverage  
Phased local peaks  
Nucleosome frequency components  
Phased (>146 bp)  
Core (150-180 bp)  
Core + spacer (180-210 bp)

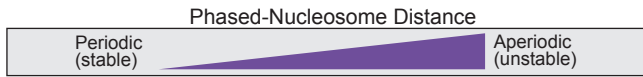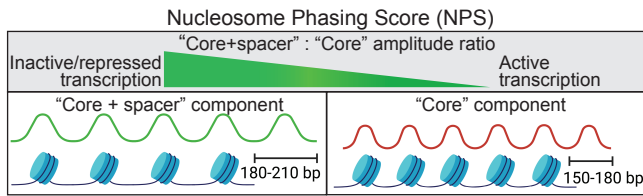

**B**

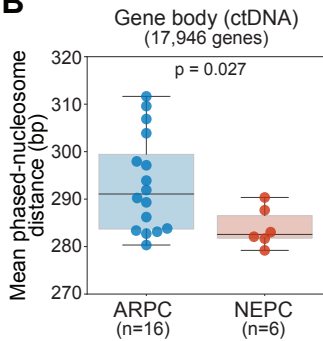

**C**

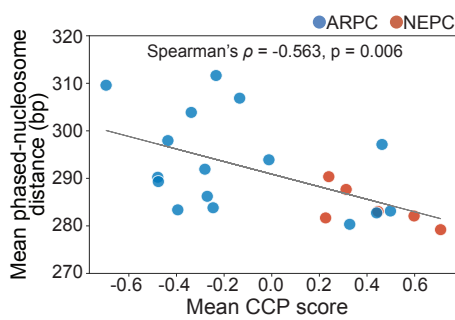

**D**

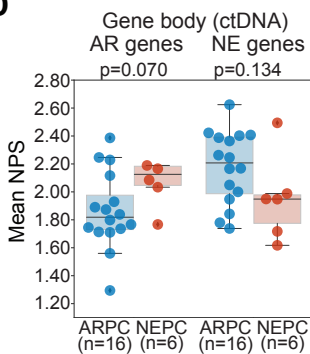

**E**

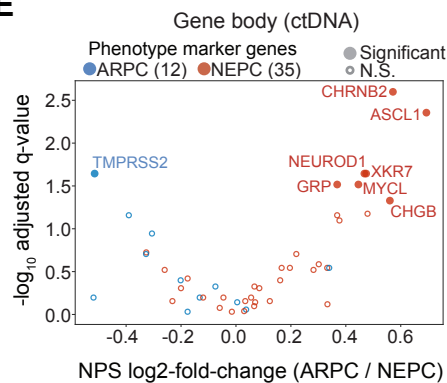

**F**

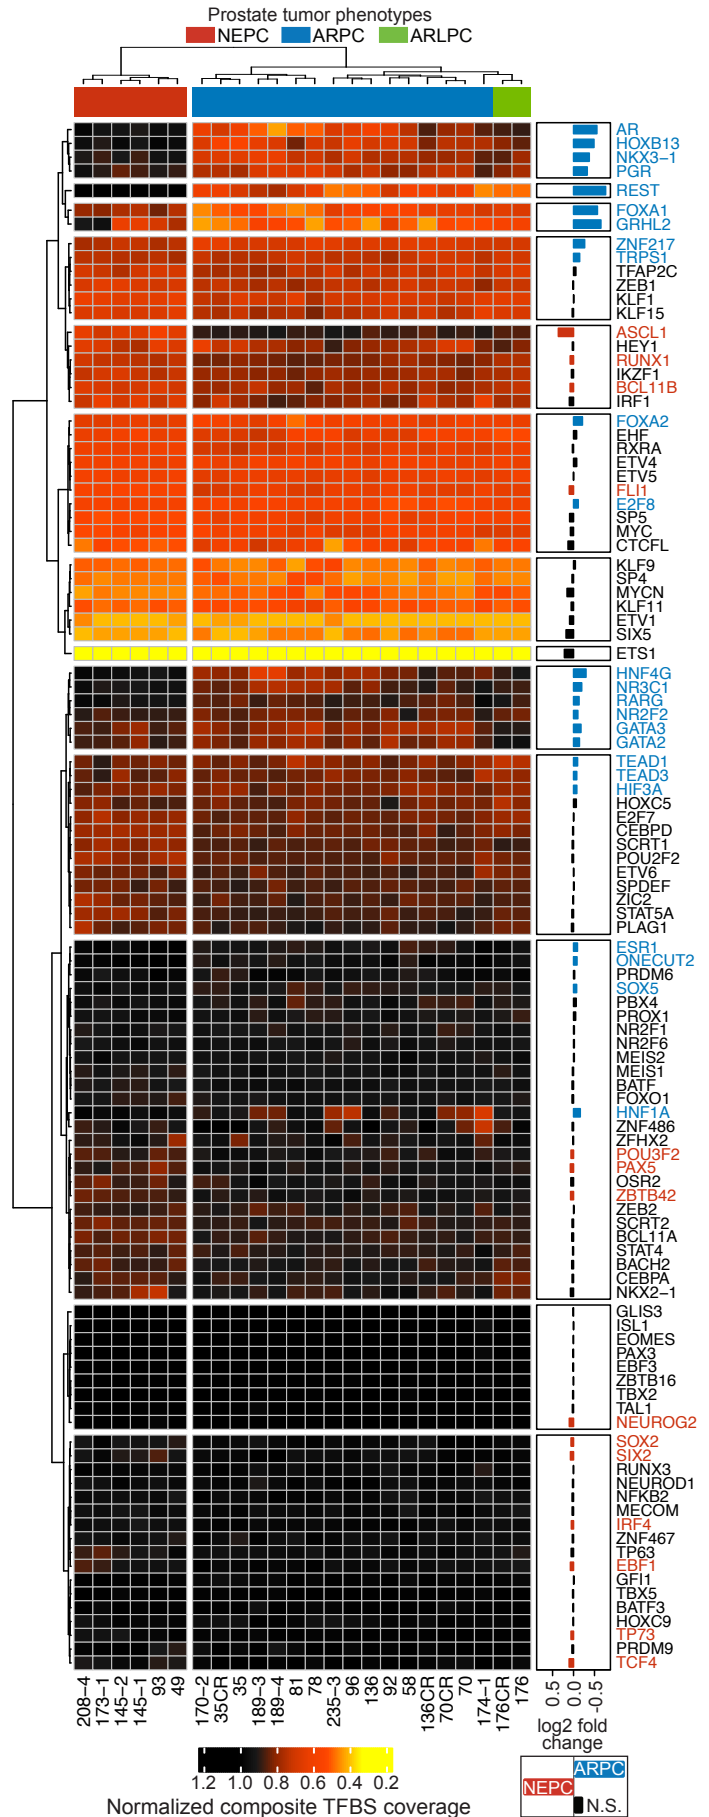

**Figure 3**

1161 **Figure 3. Phasing analysis in ctDNA recapitulates nucleosome stability and trends in**  
1162 **transcriptional activity between CRPC phenotypes**

1163 **(A)** Illustration of nucleosome phasing analysis using TritonNP for HOXB13, which is  
1164 expressed in ARPC but not NEPC. Fourier transform and a band-pass filter-based  
1165 smoothing method was used to phase and identify peaks (grey dotted lines). Frequency  
1166 components corresponding to > 146 bp (wavelength) are shown in purple. The mean inter-  
1167 nucleosome distance was computed from all peaks in the gene body: lower values  
1168 represent more periodic and stable nucleosomes. Nucleosome Phasing Score (NPS) is  
1169 defined as the ratio of the mean amplitudes between frequency components 180-210 bp  
1170 (“core + spacer”, green curve) and 150-180 bp (“core”, red curve).

1171 **(B)** Boxplot of mean phased-nucleosome distance in 17,946 gene bodies per ctDNA sample  
1172 for ARPC and NEPC PDX lines. Two-tailed Mann-Whitney U test p-value shown.

1173 **(C)** Comparison of the mean phased-nucleosome distance and the mean cell-cycle  
1174 progression (CCP) score (estimated from RNA-Seq) for 16 ARPC and 6 NEPC PDX lines.

1175 **(D)** Boxplot of NPS in gene bodies of 47 phenotype-defining genes (35 NE-regulated and 12  
1176 AR-regulated) between ARPC and NEPC lines. Two-tailed Mann-Whitney U test p-values  
1177 shown.

1178 **(E)** Volcano plot of NPS log<sub>2</sub>-fold-change (ARPC/NEPC) in the 47 phenotype-defining genes.  
1179 Genes with significantly higher NPS scores (solid-colored dots (two-tailed Mann-Whitney  
1180 U test, Benjamini-Hochberg adjusted FDR at  $p < 0.05$ ) and non-significant genes (open  
1181 circle) are shown.

1182 **(F)** Hierarchical clustering of the normalized composite central mean coverage at TFBSs from  
1183 the Griffin analysis of ctDNA for 107 TFs in LuCaP PDX lines of ARPC (n=16), NEPC  
1184 (n=6), and ARLPC (n=2) phenotypes. This list of TFs was initially selected as having  
1185 differential expression between ARPC and NEPC from LuCaP PDX RNA-Seq analysis.  
1186 Heatmap colors indicate increased accessibility (low values; yellow, orange, red) and  
1187 decreased accessibility (higher values; black) in ctDNA. TFs with increased accessibility  
1188 in NEPC samples (log<sub>2</sub>-fold-change > 0.05, Mann-Whitney U test  $p < 0.05$ ) are indicated  
1189 with red text; increased accessibility in ARPC (log<sub>2</sub>-fold-change < -0.05,  $p < 0.05$ ) are  
1190 indicated with blue text.

1191

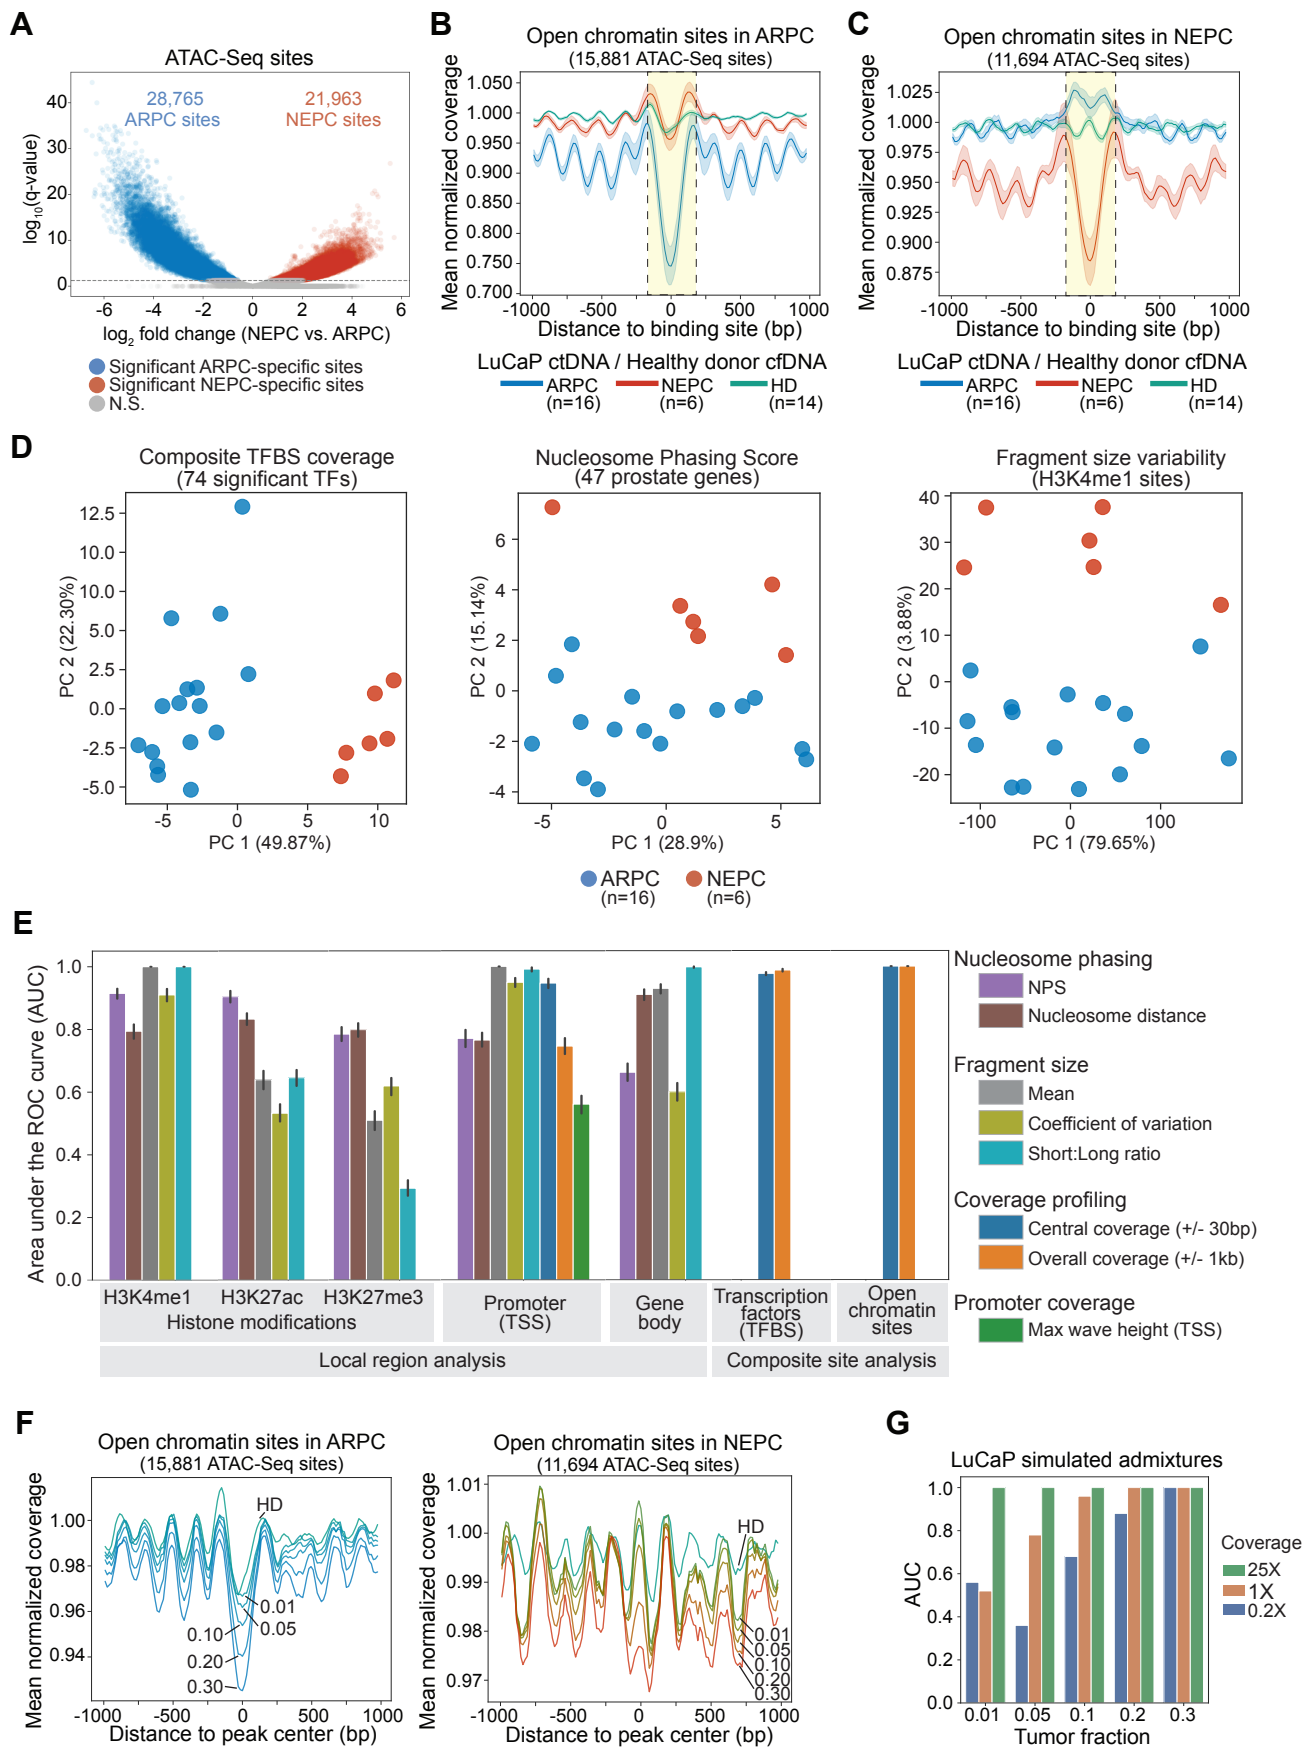

**Figure 4**

1192 **Figure 4. Comprehensive evaluation of ctDNA features throughout the genome for CRPC**  
1193 **phenotype classification in PDX models**

1194 (A) Volcano plot of log<sub>2</sub>-fold change of ATAC-Seq peak intensity between 5 ARPC and 5  
1195 NEPC lines; the dotted line demarcates sites by q-value < 0.05.

1196 **(B-C)** Composite coverage profiles at open chromatin sites specific to ARPC **(B)** and NEPC  
1197 **(C)** PDX tumors analyzed by Griffin. Sites from (A) were filtered for overlap with known  
1198 TFBSs in 338 factors from GTRD (97). Coverage profile means (lines) and 95%  
1199 confidence interval with 1000 bootstraps (shading) are shown. The region ±150 bp is  
1200 indicated with vertical dotted line and yellow shading.

1201 **(D)** PCAs of ctDNA features demonstrates grouping between ARPC and NEPC phenotypes:  
1202 **(left)** Composite central coverage of TFBSs significant for 74 TFs with differential  
1203 accessibility out of 338 factors between ARPC and NEPC **(Supplementary Table S4)**.  
1204 **(center)** NPS in the gene bodies of the 47 phenotype defining genes. **(right)** Fragment  
1205 size variability (coefficient of variation) at H3K4me1 histone modification sites (n=9,750).

1206 **(E)** Performance of classifying ARPC vs NEPC PDX from ctDNA using supervised machine  
1207 learning (XGBoost) in various region types (all genes, TFBSs, and open regions,  
1208 **Methods**). Area under the receiver operating characteristic curve (AUC) with 95%  
1209 confidence interval (100 repeats of stratified cross validation) is shown for performance of  
1210 all feature types.

1211 **(F)** Example composite coverage profiles at open chromatin sites specific to ARPC (left) and  
1212 NEPC (right) identified in **B-C**. Simulated admixtures generated using ARPC mixed with  
1213 healthy donor (HD) (left) and NEPC mixed with HD (right) are shown for varying tumor  
1214 fractions.

1215 **(G)** Performance for classification on admixtures samples using ctdPheno. Five ctDNA  
1216 admixtures were generated for each phenotype from PDX lines, each at various  
1217 sequencing coverages and tumor fractions. In total, 125 admixtures were evaluated. The  
1218 mean AUC across the 5 admixtures is shown for each configuration.

1219

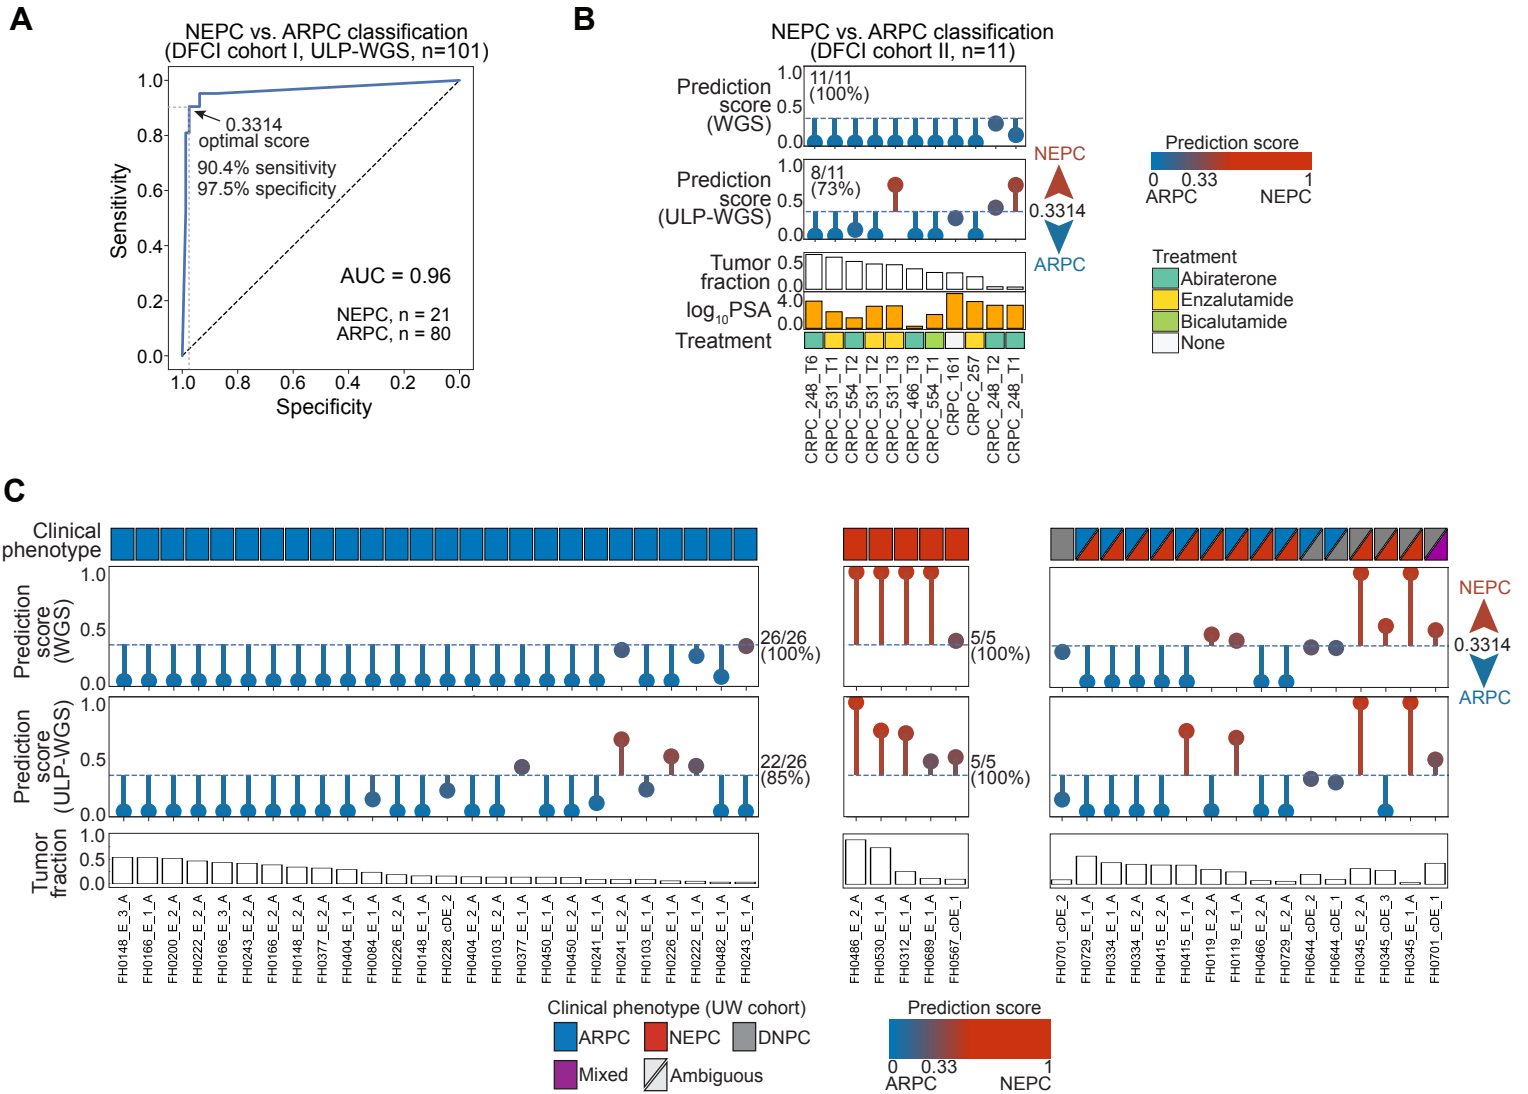

Figure 5

1220 **Figure 5. Accurate classification of NEPC phenotypes from plasma in three patient**  
1221 **cohorts using a probabilistic model (ctdPheno) informed by PDX ctDNA features**

1222 (A) Receiver operating characteristic (ROC) curve for 101 mCRPC patients (DFCI cohort I)  
1223 with ultra-low-pass WGS (ULP-WGS) data. The optimal performance of 90.4% sensitivity  
1224 (for predicting NEPC) and 97.5% specificity (for predicting ARPC) corresponding to a  
1225 prediction score cutoff of 0.3314 is indicated with horizontal and vertical dotted lines,  
1226 respectively.

1227 (B) Prediction scores for 11 plasma samples from seven patients (DFCI cohort II) with both  
1228 WGS and ULP-WGS data. The 0.3314 score cutoff threshold (dotted line) was used for  
1229 classifying NEPC and ARPC. Tumor fractions were estimated by ichorCNA from WGS  
1230 data. Patients were treated for adenocarcinoma (ARPC) or had high PSA values.

1231 (C) Prediction scores for 47 plasma samples with clinical phenotypes comprising 26 ARPC  
1232 (blue), 5 NEPC (red), and 16 mixed or ambiguous phenotypes (purple, triangles), including  
1233 double-negative prostate cancer (DNPC; grey). Scores are shown for WGS and ULP-  
1234 WGS (0.1X) for the same ctDNA sample. The cutoff threshold of 0.3314 (dotted line) was  
1235 used for classifying NEPC and ARPC. Tumor fractions were estimated by ichorCNA on  
1236 the WGS data.
